1 **Col6a1<sup>+</sup>/CD201<sup>+</sup> telocytes regulate intestinal morphogenesis and homeostasis**

2

3 Maria-Theodora Melissari<sup>1,a</sup>, Ana Henriques<sup>1,a,b</sup>, Christos Tzaferis<sup>2</sup>, Alejandro  
4 Prados<sup>2</sup>, Michalis E. Sarris<sup>1</sup>, Panagiotis Chouvardas<sup>2,3,4</sup>, Sofia Grammenoudi<sup>1</sup>, George  
5 Kollias<sup>2,5</sup> and Vasiliki Koliaraki<sup>1</sup>

6

7 <sup>1</sup>Institute for Fundamental Biomedical Research, Biomedical Sciences Research  
8 Center (B.S.R.C.) “Alexander Fleming”, Vari, 16672, Greece; <sup>2</sup>Institute for  
9 Bioinnovation, Biomedical Sciences Research Center (B.S.R.C.) “Alexander  
10 Fleming”, Vari, 16672, Greece; <sup>3</sup>Department of Medical Oncology, Inselspital, Bern  
11 University Hospital, University of Bern, Switzerland; <sup>4</sup>Department for BioMedical  
12 Research, University of Bern, Bern, Switzerland; <sup>5</sup>Department of Physiology, Medical  
13 School, National and Kapodistrian University of Athens, Athens, 11527, Greece

14

15 <sup>a</sup>M.T.M and A.H. contributed equally to this work.

16 <sup>b</sup>Present address: Institute for Research in Biomedicine (IRB Barcelona), The  
17 Barcelona Institute of Science and Technology, Barcelona, Spain.

18

19 **Correspondence:**

20 Vasiliki Koliaraki,

21 E-mail: [koliaraki@fleming.gr](mailto:koliaraki@fleming.gr)

22

23

24

25 **Abstract**

26 Intestinal mesenchymal cells encompass multiple subsets, whose origins, functions,  
27 and pathophysiological importance are still not clear. Here, we used the *Col6a1<sup>Cre</sup>*  
28 mouse, which targets telocytes and perivascular cells that can be further distinguished  
29 by the combination of the CD201, PDGFR $\alpha$  and  $\alpha$ SMA markers. Lineage tracing  
30 revealed that telocytes originate from mesenchymal aggregates and are crucial for  
31 intestinal morphogenesis and patterning. Cell depletion experiments showed that  
32 *Col6a1<sup>+</sup>/CD201<sup>+</sup>* telocytes regulate homeostatic enteroendocrine cell differentiation  
33 and epithelial proliferation. During acute colitis, they expressed an inflammatory and  
34 extracellular matrix remodeling gene signature, but they also retained their properties  
35 and topology. Notably, both in homeostasis and tissue regeneration, they were  
36 dispensable for normal organ architecture, as they were replaced by CD34<sup>+</sup>  
37 mesenchymal cells, providing thus evidence for the plasticity potential of distinct  
38 mesenchymal populations in the intestine. Therefore, our results provide a  
39 comprehensive analysis of the identities, origin, and functional significance of colonic  
40 *Col6a1<sup>Cre+</sup>* telocytes.

41

42

43

## 44 **Introduction**

45 The mammalian intestine is characterized by a unique architecture, which ensures  
46 both efficient nutrient and water absorption and rapid self-renewal of the intestinal  
47 epithelium. Self-renewal is mediated by Lgr5<sup>+</sup> multi-potent crypt-base stem cells  
48 (CBCs) that progressively give rise to transit amplifying (TA) progenitor cells and  
49 differentiated epithelial cell populations with specific absorptive or secretive  
50 functions [1, 2]. The tight regulation of this architectural organization is mediated by  
51 a gradient of factors produced both by epithelial and stromal cells. Among stromal  
52 cells, intestinal mesenchymal cells (IMCs) have emerged as an important cell type for  
53 the development and homeostasis of the intestine, by providing both structural support  
54 and regulatory elements [3]. Of particular interest is their contribution to the  
55 maintenance of the stem cell niche via the production of soluble mediators [4].  
56 Notably, in the absence of epithelial Wnts, production of stromal Wnts is sufficient  
57 for the maintenance of epithelial proliferation, while depletion of Foxl1<sup>+</sup> telocytes or  
58 Grem1<sup>+</sup> trophocytes, which produce niche-supporting factors led to the disruption of  
59 the intestinal structure [5-7]. Additionally, BMP production by villous mesenchymal  
60 cells inhibits proliferation and favors epithelial cell differentiation, which ensures  
61 epithelial homeostasis and supports specialized epithelial functions [8, 9]. The  
62 production of such signals is believed to be induced and maintained via the reciprocal  
63 communication with epithelial cells. This has been convincingly shown during  
64 embryonic development, where PDGF and Hh proteins secreted from the endodermal  
65 epithelium act on the underlying mesenchyme to induce the formation of PDGFR $\alpha$ <sup>+</sup>  
66 aggregates, which express BMPs and regulate vilification of the intestine [10].  
67 Beyond their homeostatic functions, intestinal fibroblasts contribute significantly to  
68 tissue damage and inflammation. During such conditions, resident fibroblastic cells

69 are activated to produce pro-inflammatory cytokines and chemokines, angiogenic  
70 factors, as well as extracellular matrix (ECM) components and remodeling enzymes  
71 to facilitate acute inflammatory responses. Deregulation of these processes or chronic  
72 injury can lead to chronic inflammatory disorders and fibrosis [11]. Indeed, recent  
73 data point to an important role of the microenvironment in shaping cellular programs  
74 and driving epithelial regeneration, as fibroblast-specific deletion of the Wnt regulator  
75 porcupine (Porcn) or R-spondin 3 led to severely impaired intestinal regeneration [12,  
76 13].

77 Until recently, mesenchymal cells in the intestine, although known to constitute a  
78 group of cell types, were frequently studied as one, mainly due to difficulties in  
79 marking, isolating and genetically targeting specific populations. However, recent  
80 single-cell transcriptomic analyses of the normal mouse and human intestine revealed  
81 the underappreciated extent of mesenchymal heterogeneity and identified several  
82 fibroblast subsets with distinct expression profiles and functions [4, 7, 14-16].  
83 However, their origin and spatial organization, as well as the mechanisms through  
84 which distinct subsets coordinate signaling gradients along the crypt-villus axis in  
85 homeostasis and disease remain elusive. The use of specific markers and Cre-  
86 expressing mouse lines have begun to provide such information and are crucial for  
87 addressing these issues. Examples include CD34, Foxl1, PDGFR $\alpha$  and Gli1 positive  
88 IMCs, which act as critical regulators of the intestinal stem cell niche through their  
89 production of Wnts, R-spondins and Gremlin 1, although they are not strictly  
90 restricted to single cell types [6, 7, 12, 13, 17, 18]. Lgr5<sup>+</sup> villous tip telocytes were  
91 also recently shown to regulate epithelial villus tip gene expression programs [19].  
92 Single-cell analysis of the inflamed intestine has further highlighted the prominent  
93 pro-inflammatory activation of fibroblasts [14, 15, 20]. Notably, activated fibroblasts



94 along with immune cells were associated with resistance to anti-TNF therapy,  
95 indicating their potential utility in patient diagnosis, stratification and therapeutic  
96 decisions [15, 20].

97 We have previously shown that the *Col6a1<sup>Cre</sup>* transgenic mouse targets a fraction of  
98 mesenchymal cells in the intestine and that NFκB signaling in this subset uniquely  
99 protects against colitis and colitis-associated cancer [21]. In this study, transcriptomic,  
100 imaging and functional analysis of the cells targeted by the *Col6a1<sup>Cre</sup>* mouse revealed  
101 preferential targeting of colonic telocytes/subepithelial myofibroblasts (SEMFs) and  
102 perivascular cells, which can be further described by the use of specific markers.  
103 Using lineage tracing and cell depletion approaches we have further identified their  
104 origin from mesenchymal clusters during embryogenesis, as well as their functional  
105 significance in development and adulthood. Notably, both in normal conditions and  
106 during tissue regeneration, CD34<sup>+</sup> IMCs could compensate for the loss of colonic  
107 *Col6a1<sup>Cre+</sup>* telocytes, revealing the plasticity of IMCs towards organ homeostasis.

108

## 109 **Results**

### 110 **The *Col6a1<sup>Cre</sup>* mouse targets CD34<sup>+</sup> mesenchymal cells in the intestine**

111 We have shown in the past that the *Col6a1<sup>Cre</sup>* transgenic mouse targets a fraction of  
112 mesenchymal cells in the intestine [21]. To define its specificity for distinct  
113 mesenchymal subsets, we crossed *Col6a1<sup>Cre</sup>* mice with a TdTomato-to-GFP  
114 replacement (mTmG) reporter strain (*Col6a1<sup>mTmG</sup>*) and after exclusion of immune,  
115 endothelial, erythroid and epithelial cells using the lineage negative (Lin<sup>-</sup>) markers  
116 CD45, CD31, Ter119 and CD326 (EpCAM), we isolated *Col6a1*-GFP<sup>+</sup> and *Col6a1*-  
117 GFP<sup>-</sup> IMCs by FACS sorting (Figure 1A). As previously reported, the *Col6a1<sup>Cre</sup>*  
118 mouse does not target Lin<sup>+</sup> cells [21]. We then performed 3' mRNA sequencing of the

119 Lin<sup>-</sup>GFP<sup>+</sup> IMCs (GC), Lin<sup>-</sup>Tomato<sup>+</sup> IMCs (TC) and the initial unsorted cells (UC).  
120 Gene Ontology (GO) analysis of the upregulated genes in the GC versus the TC  
121 and/or UC cells revealed enrichment in biological processes related to epithelial cell  
122 proliferation and differentiation, as well as regulation of vasoconstriction and blood  
123 pressure (Figure 1B). Enriched genes associated with epithelial differentiation  
124 included *Bmps* (*Bmp3*, *Bmp7*, *Bmp2*, *Bmp5*), *Wnt5a*, the Wnt inhibitor *Wif1* and  
125 genes related to the differentiation of epithelial cells (e.g. *Fgf9*) [8]. Conversely, the  
126 TC population expressed genes associated with the maintenance of the stem cell  
127 niche, such as *Grem1*, *Wnt2* and *Nog* [7, 17] (Figure 1B).  
128 A similar cell sorting and sequencing approach was also performed for the small  
129 intestine, where two populations of GFP<sup>+</sup> cells were identified, a GFP<sup>hi</sup> (GIH) and a  
130 GFP<sup>lo</sup> (GIL) population, each accounting for 23% and 29% of the Lin<sup>-</sup> population,  
131 respectively (Figure supplement 1A). Analysis of the genes identified in the colon  
132 showed that GIH cells were also enriched in genes related to epithelial differentiation  
133 and blood vessel function, while GFP<sup>lo</sup> (GIL) cells were similar to the GFP<sup>-</sup>  
134 population (Figure supplement 1B). The presence of GFP<sup>lo</sup> cells in the small intestine  
135 indicates a GFP<sup>+</sup> cell population with potentially different cellular properties [22], and  
136 could represent a distinct cell subset, an intermediate state between GFP<sup>-</sup> and GFP<sup>+</sup>  
137 cells or the result of non-specific recombination. These results suggest that *Col6a1*<sup>Cre+</sup>  
138 cells have distinct homeostatic functions, potentially associated with different  
139 topologies along the colonic crypt length and the crypt/villous axis in the small  
140 intestine.  
141 Interestingly, one of the genes enriched in the GFP<sup>-</sup> samples in both the small  
142 intestine and colon was *Cd34* (Figure 1B). Stzepourginski et al. [17] described a  
143 broad population of PDPN<sup>+</sup>CD34<sup>+</sup> cells, which are located at the bottom of the crypts,

144 express Gremlin1, Wnt2b and R-spondin, and play a role in stem cell maintenance.  
145 FACS analysis and immunohistochemistry showed that indeed the majority of GFP<sup>+</sup>  
146 cells in the colon and GFP<sup>hi</sup> in the small intestine were CD34 negative and further  
147 indicated a preferential subepithelial localization for GFP<sup>+</sup> cells outside the bottom of  
148 the crypts (Figure 1C-D and Figure supplement 1C-D). Consistent with this data, co-  
149 culture of either GFP<sup>+</sup> or GFP<sup>-</sup> IMCs with intestinal organoids showed that GFP<sup>+</sup> cells  
150 were less potent than GFP<sup>-</sup> cells in supporting the growth of epithelial organoids in  
151 the absence or presence of R-spondin 1 (Figure 1E-F). Comparison of the gene  
152 signature of mesenchymal subsets from the recently published single-cell RNA  
153 sequencing of the mouse colon by Kinchen et al., [14] and the gene expression profile  
154 of GFP<sup>+</sup> cells revealed an association with the Str2 cluster (Figure 1G-H).  
155 Importantly, this cluster appears to be the highest conserved between mice and  
156 humans [14]. These results show that the *Col6a1*<sup>Cre</sup> mouse targets predominantly  
157 CD34<sup>-</sup> mesenchymal cells outside the bottom of the intestinal crypt, rendering it ideal  
158 for the functional characterization of these cells.

159

160 **Colonic *Col6a1*<sup>Cre</sup>-GFP<sup>+</sup> cells are CD201 positive and include predominantly**  
161 **telocytes/SEMFs**

162 We next searched our sequencing data for markers that could be used to detect, isolate  
163 and study *Col6a1*<sup>Cre</sup>-GFP<sup>+</sup> cells. We found that GFP<sup>+</sup> cells express higher levels of  
164 CD201 (Procr or EPCR), which was further verified by immunohistochemistry  
165 (Figure 2A). FACS analysis indeed showed that 67% and 48% of the Lin<sup>-</sup>GFP<sup>+</sup>  
166 population in the colon and Lin<sup>-</sup>GFP<sup>hi</sup> in the small intestine were CD201<sup>+</sup>,  
167 respectively (Figure 2B and Figure supplement 1E). It should be noted that CD201 is  
168 also expressed by endothelial cells, which are excluded as Lin<sup>-</sup> in our analysis. Since

169 not all GFP<sup>+</sup> cells express CD201, we also isolated Lin<sup>-</sup>GFP<sup>+</sup>CD201<sup>+</sup> and Lin<sup>-</sup>  
170 GFP<sup>+</sup>CD201<sup>-</sup> cells from the colon by FACS sorting. qPCR analysis showed that  
171 GFP<sup>+</sup>CD201<sup>+</sup>, but not GFP<sup>+</sup>CD201<sup>-</sup> cells, expressed genes related both to the  
172 regulation of blood vessel function and epithelial cell differentiation, similar to GFP<sup>+</sup>  
173 cells (Figure 2C). These results suggest that the remaining *Col6a1*<sup>Cre+</sup>CD201<sup>-</sup> cells  
174 either have another yet unknown role in the intestine or are the result of non-specific  
175 targeting by the *Col6a1*<sup>Cre</sup> mouse.

176 Combination of the CD201 and CD34 markers along with Lin<sup>-</sup> expression was able to  
177 distinguish between the two distinct intestinal mesenchymal populations (Figure 2D  
178 and Figure supplement 2A). Additional co-staining with PDGFR $\alpha$  and  $\alpha$ SMA  
179 revealed the presence of multiple subsets within CD201<sup>+</sup> cells, including PDGFR $\alpha$ <sup>hi</sup>-  
180  $\alpha$ SMA<sup>lo/-</sup> (66%), PDGFR $\alpha$ <sup>lo</sup>- $\alpha$ SMA<sup>lo/-</sup> (25%) and PDGFR $\alpha$ <sup>-</sup> $\alpha$ SMA<sup>hi</sup> cells (3%) (Figure  
181 2D and Figure supplement 2B-D). CD34<sup>+</sup> cells were mainly PDGFR $\alpha$ <sup>lo/-</sup> and only a  
182 limited number expressed  $\alpha$ SMA, in line with recent reports [7, 17] (Figure 2D).  
183 GFP<sup>+</sup>PDGFR $\alpha$ <sup>-</sup> $\alpha$ SMA<sup>hi</sup> cells were found around blood vessels and were most possibly  
184 pericytes (Figure 2E and Figure supplement 2D), as also indicated by qPCR analysis  
185 (Figure supplement 2E) and previous results [4, 23]. GFP<sup>+</sup>PDGFR $\alpha$ <sup>hi</sup> $\alpha$ SMA<sup>lo/-</sup> were  
186 long thin cells in a subepithelial location found both clustered at the top of the colonic  
187 crypts and individually along the crypt's length, corresponding to telocytes or  
188 subepithelial myofibroblast (SEMFs) (Figure 2F-H and Figure supplement 2C) [4, 7,  
189 13, 19]. Indeed, GFP<sup>+</sup> cells expressed markers related to telocytes, including *Foxl1*,  
190 *Bmp7*, *Wif1* and *Wnt5a* (Figure 1B and Figure supplement 2E). Finally,  
191 GFP<sup>+</sup>PDGFR $\alpha$ <sup>lo</sup>- $\alpha$ SMA<sup>lo/-</sup> cells appeared as flat cells with extended processes that  
192 surround the colonic crypt (Figure 2F). FACS-based quantification of *Col6a1*<sup>Cre</sup>-  
193 GFP<sup>+</sup> cells in these subsets revealed targeting of almost all CD201<sup>+</sup>PDGFR $\alpha$ <sup>hi</sup>

194 telocytes (96.7%) and one third of the PDGFR $\alpha$ <sup>lo</sup> stroma (27.8%), including mainly  
195 CD201<sup>+</sup>PDGFR $\alpha$ <sup>lo</sup> cells (77.8% versus 11.7% of CD34<sup>+</sup>PDGFR $\alpha$ <sup>lo</sup> cells) (Figure 2I).  
196 Absence of Gremlin1 expression (Figure 1B) indicates that none of the latter include  
197 trophocytes. The *Col6a1*<sup>Cre</sup> mouse also targeted approximately 86% of  
198 CD201<sup>+</sup> $\alpha$ SMA<sup>hi</sup> pericytes (Figure 2K). However, the apparent low abundance of this  
199 population suggests that expression of genes related to blood vessel function could be  
200 also associated with the localization of *Col6a1*<sup>Cre</sup>-GFP<sup>+</sup> cells in close proximity to the  
201 subepithelial capillary network, indicating thus a dual function for colonic  
202 telocytes/SEMFs (Figure 2L). These results reveal the complexity of mesenchymal  
203 cells surrounding the colonic crypt and provide a detailed characterization of their  
204 markers and localization. They further suggest that the *Col6a1*<sup>Cre</sup> mouse could be  
205 used for the functional analysis of colonic telocytes/SEMFs.

206

### 207 **Telocytes/SEMFs originate from embryonic mesenchymal aggregates and** 208 **orchestrate intestinal morphogenesis**

209 To examine the origin of intestinal telocytes/SEMFs during embryonic organogenesis,  
210 we analysed *Col6a1*<sup>mTmG</sup> mice at different developmental stages. We found that GFP<sup>+</sup>  
211 cells were absent until E13.5 and started to appear at E14.5-E15.5 as aggregates  
212 beneath the epithelial layer (Figure 3A). As villi became more elongated, GFP<sup>+</sup> cells  
213 extended toward the bottom of the crypts (Figure 3B). GFP<sup>+</sup> aggregates expressed  
214 PDGFR $\alpha$ , as shown by both confocal microscopy and FACS analysis, in line with  
215 previous reports [24-26] (Figure 3A-B and 3D). Notably, similar GFP<sup>+</sup> PDGFR $\alpha$ <sup>+</sup>  
216 aggregates were also detected in the developing colon (Figure 3A-B). FACS analysis  
217 showed that the majority of GFP<sup>+</sup> cells corresponded to 28% and 38.3% of PDGFR $\alpha$ <sup>hi</sup>  
218 cells at E16.5 and E18.5, respectively (Figure 3D and E). Contrary to adulthood, the

219 *Col6a1<sup>Cre</sup>* mouse targeted a limited number of other mesenchymal populations,  
220 including PDGFR $\alpha$ <sup>lo</sup> and  $\alpha$ SMA<sup>+</sup> cells, which indicates its specificity for telocytes or  
221 telocyte precursors during development (Figure 3D-E). It should be noted that CD34  
222 was not expressed at this stage in agreement with previous reports [17]. CD201 was  
223 broadly expressed, although it did include PDGFR $\alpha$ <sup>hi</sup> cells also targeted by the  
224 *Col6a1<sup>Cre</sup>* mouse (Figure 3F). These results show that telocytes originate from  
225 mesenchymal villous and colonic clusters and in combination with previous published  
226 results [10] indicate that they acquire their identities during early organogenesis.  
227 To define the physiological importance of these cells during intestinal embryonic  
228 development, we employed the iDTR strain [27] in combination with the *Col6a1<sup>mTmG</sup>*  
229 mice (*Col6a1<sup>DTR</sup>*). Administration of diphtheria toxin (DT) in *Col6a1<sup>DTR</sup>* mice at E14.5  
230 and E15.5 and subsequent ex vivo culture of the embryonic intestine for 48 hours  
231 resulted in depletion of *Col6a1*-GFP<sup>+</sup> cells and a significant reduction in the number  
232 of developing villi (Figure 3G-I, Figure supplement 3 and Supplementary Videos 1  
233 and 2). Total and GFP<sup>+</sup> villi were separately quantified in the *Col6a1<sup>DTR</sup>* mice to take  
234 into account potential inefficient or patchy deletion, while all villi appear to have  
235 GFP<sup>+</sup> clusters in the control mice (Figure 3I and Supplementary Videos 1 and 2).  
236 Staining with PDGFR $\alpha$  and  $\alpha$ SMA did not reveal major differences in their  
237 expression patterns after GFP<sup>+</sup> cell depletion, in agreement with the level of *Col6a1<sup>Cre</sup>*  
238 targeting at this stage (Figure 3C-E and 3H). These results provide direct proof for the  
239 role of telocyte/SEMF precursors as orchestrators of intestinal morphogenesis and  
240 patterning.

241

242 **Colonic *Col6a1<sup>Cre+</sup>* IMCs regulate homeostatic epithelial proliferation and**  
243 **enteroendocrine cell differentiation**

244 To define the homeostatic roles of colonic *Col6a1*<sup>Cre+</sup> IMCs, we then depleted  
245 *Col6a1*-GFP<sup>+</sup> cells in 4-6-month-old *Col6a1*<sup>DTR</sup> mice. Due to increased lethality upon  
246 systemic DT injection, we performed local intrarectal DT administration, as shown in  
247 Fig. 4A. Efficient, albeit not complete, depletion of GFP<sup>+</sup> cells (75 % reduction) at the  
248 last 3-4 cm of the colon was verified by confocal imaging and FACS analysis (Fig.  
249 4B-C). Further analysis of the remaining GFP<sup>+</sup> cells showed that although all  
250 subtypes were depleted, there was a preferential loss of PDGFR $\alpha$ <sup>hi</sup> cells and a  
251 proportional increase in PDGFR $\alpha$ <sup>lo</sup> cells (Fig. 4D). Accordingly, and consistent with  
252 our previous data (Fig. 2), PDGFR $\alpha$ <sup>hi</sup>CD201<sup>+</sup> telocytes/SEMFs were reduced by 90%,  
253 while PDGFR $\alpha$ <sup>lo</sup> stromal cells were proportionally increased by 11%, and PDGFR $\alpha$ <sup>-</sup>  
254 cells remained largely unaltered (Fig. 4E-F). These results indicate that  
255 telocytes/SEMFs is the mesenchymal subpopulation most efficiently depleted using  
256 our approach. Histopathological examination of *Col6a1*<sup>DTR</sup> mice showed that the  
257 intestinal structure was normal following DT administration (Figure 4G).  
258 Immunohistochemistry and/or qPCR analysis for the quantification of specific  
259 intestinal epithelial subpopulations showed a reduction in enteroendocrine cell  
260 differentiation upon GFP<sup>+</sup> cell depletion, while stem cell maintenance, as well as the  
261 differentiation of Tuft and Goblet cells was not affected (Figure 4H-I and Figure  
262 supplement 4). Quantification of telocyte markers in these tissue samples showed a  
263 reduction in *Bmp7* and *Wnt5a* expression levels, while the expression of most other  
264 *Bmps* and *Foxl1* was not altered (Figure 4J). Notably, *Bmp7*, which forms  
265 heterodimers with *Bmp2* and *Bmp4* was previously shown to be one of the factors  
266 that is exclusively expressed by PDGFR $\alpha$ <sup>+</sup> telocytes at the crypt-villous boundary of  
267 the small intestine [7]. In addition, we also detected a defect in the distribution of  
268 BrdU<sup>+</sup> proliferating epithelial cells along the crypt axis, characterized by an increase

269 toward the top of the crypt, which could be associated with the role of BMPs in the  
270 regulation of stem cells [28] (Figure 4K-L). These results show that colonic  
271 *Col6a1*<sup>Cre+</sup> telocytes/SEMFs have distinct pathophysiological roles in epithelial cell  
272 differentiation and proliferation, although they are largely dispensable for normal  
273 tissue architecture and function.

274

### 275 **CD34<sup>+</sup> mesenchymal cell plasticity compensates for the loss of *Col6a1*<sup>Cre+</sup> IMCs**

276 The similar expression levels of most BMPs in the *Col6a1*<sup>DTR</sup> mice and its normal  
277 tissue architecture indicated that other mesenchymal cell populations could mediate  
278 some of the functions of *Col6a1*<sup>Cre+</sup> telocytes/SEMFs under these conditions. Indeed,  
279 we found that colonic crypt tops in the *Col6a1*<sup>DTR</sup> mice were populated by GFP<sup>+</sup>  
280 PDGFR $\alpha$ <sup>+</sup>CD34<sup>+</sup> cells, which however remained PDGFR $\alpha$ <sup>lo</sup> (Figure 5A-B). CD34<sup>+</sup>  
281 cells in this area were also Ki67<sup>+</sup>, indicating that these cells could proliferate and  
282 occupy the space, where *Col6a1*<sup>Cre+</sup> telocytes were previously located (Figure 5C-D).  
283 Interestingly, CD34<sup>+</sup> cells in this area also expressed  $\alpha$ SMA, a marker commonly  
284 upregulated in response to fibroblast activation (Figure E-G). These results show that  
285 following *Col6a1*<sup>Cre+</sup> telocyte/SEMF depletion, CD34<sup>+</sup> cells become activated, they  
286 proliferate and occupy the space at the top of the colonic crypts, partly compensating  
287 for the loss of telocytes, providing thus evidence for mesenchymal plasticity in the  
288 intestine.

289

### 290 **Topological and functional plasticity of mesenchymal cells during intestinal** 291 **regeneration**

292 To further explore the functions of *Col6a1*-GFP<sup>+</sup> cells in non-homeostatic conditions,  
293 we subjected *Col6a1*<sup>mTmG</sup> mice to the DSS model of acute colitis and isolated Lin-



294 GFP<sup>+</sup> (GDS) and Lin-Tomato<sup>+</sup> (TDS) cells by FACS sorting, as previously described  
295 (Figure 6A). Comparisons between GFP<sup>+</sup> and GFP<sup>-</sup> IMCs and the unsorted population  
296 (UDS), as well as cells from untreated mice and subsequent Gene Ontology analysis  
297 revealed that both GDS and TDS cells were enriched for functions related to  
298 inflammatory/ immune responses (Figure 6B). GDS and TDS samples also showed  
299 enrichment in genes related to epithelial proliferation/differentiation and blood vessel  
300 function, similar to the homeostatic situation, suggesting that these cells, although  
301 activated, retain their homeostatic properties and marker expression (Figure 6B and  
302 Figure supplement 5A). FACS analysis of mesenchymal populations described in  
303 Figure 2 verified their presence also during acute colitis, although CD201<sup>+</sup>PDGFR $\alpha$ <sup>-</sup>  
304  $\alpha$ SMA<sup>hi</sup> were increased in accordance with fibroblast activation (Figure supplement  
305 5B-C). Confocal imaging further revealed that in sites of ulceration GFP<sup>+</sup> cells were  
306 located in the upper part of the damaged area, indicating that they also retained their  
307 topology (Figure 6C). This was further verified by comparisons with the recently  
308 published single cell RNA-seq data by Kinchen et al., which confirmed that GDS  
309 cells corresponded to the Str2 population [14] (Figure 6D).

310 Depletion of GFP<sup>+</sup> cells during DSS administration and evaluation of tissue  
311 morphology 21 days after the initiation of the protocol showed similar  
312 histopathological score to untreated mice, indicating normal regeneration of the  
313 intestine (Figure 6E-H). Similar to homeostasis, GFP<sup>-</sup>PDGFR $\alpha$ <sup>+</sup>CD34<sup>+</sup> cells were  
314 localized at the crypt tops, indicating the plasticity of CD34<sup>+</sup> cells and their ability to  
315 differentiate to colonic *Col6a1*<sup>Cre+</sup> telocytes/SEMFs and support normal re-  
316 epithelization of the colon (Figure 6I). Notably, at this late time-point, CD34<sup>+</sup> cells  
317 were not  $\alpha$ SMA<sup>+</sup>, indicating their potential reversible activation following  
318 *Col6a1Cre*<sup>+</sup> cell depletion (Fig. 6J). Therefore, these results further support the

319 plasticity of intestinal mesenchymal cells and suggest that reciprocal signals between  
320 the epithelium and the underlying mesenchyme are more or equally important to  
321 specialized cell types for intestinal regeneration.

322

## 323 **Discussion**

324 The importance of the mesenchymal stroma in the maintenance of intestinal structure  
325 and function, as well as in the response to injury is now well-established [3, 4].

326 Opposing signaling gradients along the colonic crypt length and the crypt/villous axis  
327 in the small intestine, including predominantly Wnts, BMPs, and their inhibitors, are  
328 considered crucial for the maintenance of this morphology and the presence of  
329 specialized mesenchymal cell types could explain this phenomenon [8]. Indeed,  
330 several studies have described specific cell subsets that act as regulators of the stem  
331 cell niche [6, 7, 13, 15-18]. Accordingly, although less studied, telocytes and specific  
332 fibroblast subsets identified by sc-RNA sequencing analyses have been shown to  
333 express BMPs and regulators of epithelial differentiation [6, 7, 14, 19, 29].

334 In this study, we focused on characterizing the identities, markers, origins and  
335 functional significance of the latter in intestinal development, homeostasis and tissue  
336 damage/regeneration using the *Col6a1<sup>Cre</sup>* transgenic mouse [30]. To this end, we have  
337 performed transcriptomic, FACS and imaging analysis of the cells targeted by the  
338 *Col6a1<sup>Cre</sup>* mouse strain. We also identified a novel extracellular marker, CD201, and  
339 in combination with PDGFR $\alpha$  and  $\alpha$ SMA we were able to show that the *Col6a1<sup>Cre</sup>*  
340 mice target almost all CD201<sup>+</sup>PDGFR $\alpha$ <sup>hi</sup> $\alpha$ SMA<sup>lo/-</sup> telocytes/SEMFs, around one third  
341 of the PDGFR $\alpha$ <sup>lo</sup> stroma, and specifically CD201<sup>+</sup>PDGFR $\alpha$ <sup>lo</sup> cells, as well as  
342 perivascular cells that are CD201<sup>+</sup> $\alpha$ SMA<sup>hi</sup>. Among them, telocytes/SEMFs are the  
343 only subpopulation targeted to its entirety, and it was shown to be present along the

344 colonic crypts, concentrating at their tops, in a similar fashion to the small intestine  
345 [7]. In addition, they were in close proximity to the subepithelial capillary network,  
346 indicating a potential dual role of telocytes/SEMFs in both epithelial and endothelial  
347 cell function.

348 Little is known about the developmental origins of the different mesenchymal subsets,  
349 including those identified through multiple single-cell analyses. Our results showed  
350 that *Col6a1*<sup>Cre+</sup> telocytes originate from mesenchymal clusters during development  
351 both in the small intestine and colon. These clusters have been previously shown to  
352 emerge in the murine small intestine in waves after E13.5, they are PDGFR $\alpha$ <sup>+</sup>,  
353 respond to Hedgehog signaling and express BMPs to regulate intestinal  
354 morphogenesis [10, 24-26]. Similar mechanisms play an important role also in chick  
355 intestinal development, where smooth muscle differentiation drives villi formation  
356 through forces that generate localized pockets of high Shh, crucial for the expression  
357 of mesenchymal cluster genes, such as PDGFR $\alpha$  and BMP4 [31, 32]. Deletion of  
358 either PDGF $\alpha$  or PDGFR $\alpha$  in mice was shown to result in abnormal villi development  
359 due to reduced mesenchymal proliferation [26]. Accordingly, inhibition of Hedgehog  
360 signaling led to lack of cluster formation [24]. However, PDGFR $\alpha$  is broadly  
361 expressed in the intestinal mesenchyme also during development, including both  
362 high- and low- expressing cells, as we also show [26, 33]. Similarly, the Ptc1 receptor  
363 and the downstream regulator Gli are not exclusive to mesenchymal aggregates  
364 during development [24]. FoxL1 deletion also leads to a delay in vilification, but it is  
365 expressed earlier at E12.5 and could target additional populations, as discussed below  
366 [34]. In contrast, during development, the *Col6a1*<sup>Cre</sup> mouse targets exclusively a  
367 fraction of PDGFR $\alpha$ <sup>hi</sup> cells located at the top of villi and colonic crypts. Therefore,  
368 our functional analysis through cell depletion experiments provides proof for the

369 importance of mesenchymal cluster telocytes/telocyte precursors in intestinal  
370 villification and patterning. Notably, a similar PDGFRA<sup>hi</sup> population was also  
371 recently described in the human developing intestine [35].  
372 Interestingly, depletion of this population during homeostasis did not affect the  
373 architecture and morphology of the colon, which is in agreement with the recent  
374 depletion of Lgr5<sup>+</sup> villous tip telocytes [19]. As we show, this apparent paradox can  
375 be explained by the plasticity of CD34<sup>+</sup> cells that are able to proliferate and occupy  
376 the area, where *Col6a1*<sup>Cre+</sup>/CD201<sup>+</sup> telocytes/SEMFs were previously found.  
377 However, several aspects of intestinal homeostasis were compromised, including the  
378 expression levels of *Bmp7* and *Wnt5a*, the normal differentiation of enteroendocrine  
379 cells and the distribution of proliferating cells along the crypt axis. Both the function  
380 of enteroendocrine cells and the stemness of Lgr5<sup>+</sup> cells have been previously shown  
381 to be modulated by BMP signaling [9, 28], including *Bmp7*, which forms  
382 heterodimers with *Bmp2* and *Bmp4* [35]. The exact CD34<sup>+</sup> cell subset that displays  
383 such plasticity is yet not known; however, Gremlin-1<sup>+</sup> cells have been previously  
384 shown to have stem cell potential in the intestine [36]. Notably, the phenotype of  
385 *Col6a1*<sup>Cre+</sup>/CD201<sup>+</sup> telocyte/SEMF depletion is in contrast to FoxL1<sup>+</sup> telocyte  
386 deletion using a similar methodology. However, the *Foxl1*<sup>Cre</sup> mouse has been shown  
387 to target a heterogeneous mesenchymal cell population, including pericryptal  
388 telocytes that express Gremlin-1 and myocytes [6, 13]. Although a small population,  
389 Gremlin-1<sup>+</sup> cells are crucial for intestinal homeostasis and structure, as recently  
390 shown [7]. Therefore, our results, delineate the functional importance of *Col6a1*<sup>Cre+</sup>  
391 telocytes/SEMFs at the top of the colonic crypts, illustrate how they can affect  
392 epithelial cell differentiation and proliferation and provide evidence for mesenchymal  
393 plasticity towards tissue homeostasis.

394 Similar to homeostasis, *Col6a1*<sup>Cre+</sup> cell depletion during acute DSS colitis did not  
395 affect inflammation and regeneration of the intestine, despite their inflammatory gene  
396 signature and specific topology at the top of the ulcerated tissue and thus their  
397 proximity to the regenerating epithelium. As we show, this is also associated with the  
398 plasticity of CD34<sup>+</sup> mesenchymal cells, which can replace *Col6a1*<sup>Cre+</sup>  
399 telocytes/SEMFs during the re-epithelization of the intestine, although the precise  
400 identities of these cells remain unknown. These results further suggest that reciprocal  
401 communication of the mesenchyme with the regenerating epithelium is crucial to  
402 orchestrate tissue regeneration, although the specific molecular pathways are not yet  
403 clear.

404 In conclusion, we have described the properties and identities of *Col6a1*<sup>Cre+</sup> colonic  
405 telocytes/SEMFs, defined their origin from mesenchymal aggregates and identified  
406 their role as orchestrators of intestinal morphogenesis and regulators of epithelial  
407 homeostasis. We have further introduced the concept of mesenchymal plasticity both  
408 during homeostasis and tissue repair at least towards telocyte differentiation. In the  
409 future, it would be interesting to characterize the identities and role of these cells also  
410 in other intestinal disorders, including cancer, and define the molecular mechanism  
411 driving mesenchymal plasticity in homeostasis and disease.

412

## 413 **Materials and Methods**

### 414 **Mice and Study Approval**

415 *Col6a1<sup>Cre</sup>* mice were described before [30]. *Rosa26<sup>mT/mG</sup>* and *Rosa26<sup>iDTR</sup>* mice were  
416 purchased from the Jackson Laboratory [22, 27]. All mice were maintained under  
417 specific pathogen free conditions in the Animal House of the Biomedical Sciences  
418 Research Center “Alexander Fleming”. All studies were approved by the Institutional  
419 Committee of Protocol Evaluation in conjunction with the Veterinary Service  
420 Management of the Hellenic Republic Prefecture of Attika according to all current  
421 European and national legislation and performed in accordance with the guidance of  
422 the Institutional Animal Care and Use Committee of BSRC “Alexander Fleming”.

423

### 424 **DSS colitis induction**

425 DSS-induced colitis was performed as previously described [38]. Briefly, 6-10 month  
426 old mice received 2.5% DSS in their drinking water, followed by 1-14 days of regular  
427 water. Colitis induction was monitored by measuring weight loss.

428

### 429 **Diphtheria Toxin experiments**

430 *Col6a1<sup>DTR</sup>*, control iDTR and *Col6a1<sup>Cre</sup>* mice were subjected to intrarectal  
431 administration of 100µl diphtheria toxin (Sigma-Aldrich) dissolved in 0.9% sodium  
432 chloride at 20 ng/g body weight. Pregnant mice were injected i.p. for two days (E14.5  
433 and E15.5) with 5µg DT.

434

### 435 **Embryo manipulation**

436 Timed pregnancies were set up by checking vaginal plugs to obtain E13.5, E14.5,  
437 E16.5 and E18.5 embryos. Pregnant females were sacrificed by cervical dislocation  
438 on the specific post coitum day and embryos were dissected in ice-cold PBS. Embryos  
439 were fixed overnight in 4% PFA/PBS, immersed in serial solutions of 15% and 30%  
440 sucrose/PBS and embedded in OCT for cryosection preparations.

441

#### 442 **Isolation and culture of IMCs**

443 Isolation and culture of IMCs was performed as previously described [39]. Briefly,  
444 the colon or small intestine was removed and digested as described above. The cell  
445 pellet was resuspended in culture medium, consisting of DMEM (Biochrom), 10%  
446 FBS (Biochrom), 100 U/mL penicillin/100 mg/mL streptomycin (Gibco), 2 mM L-  
447 Glutamine (Gibco), 1 µg/ml amphotericin B (Sigma) and 1% non-essential amino  
448 acids (Gibco) and plated in cell culture flasks. The medium was changed after 3-24  
449 hours and cells were used after 2-4 days.

450

#### 451 **Lightsheet Microscopy**

452 For Lightsheet microscopy, the intestine of the embryos was isolated and fixed in 4%  
453 PFA/PBS overnight. Tissue clearing was achieved using the Scale A2 clearing  
454 solution for 2 weeks [41]. The Lightsheet Z.1 from ZEISS, equipped with sample  
455 chamber and Clr Plan-Apochromat 20x/1.0, Corr nd=1.38 lens was used for  
456 experiments with tissue cleared by Scale medium, which has a refractive index of  
457 n=1.38. Quantification of villi was performed using the Imaris Software.

458

#### 459 **Immunohistochemistry**

460 For confocal microscopy and immunohistochemistry, mice were perfused with 4%  
461 PFA prior to the resection of the colon or small intestine. The tissue was then  
462 incubated in 4% PFA/PBS overnight and either immersed in serial solutions of 15%  
463 and 30% sucrose/PBS and embedded in OCT (VWR Chemicals) for cryosection  
464 preparations or in 2% agarose for sectioning with a vibratome (Leica). Sections were  
465 subsequently blocked using 1% BSA in TBS containing 0.05% Tween 20 (Sigma)  
466 (TTBS) and stained with antibodies listed in Table 1. Staining for CD201 was  
467 performed in unfixed tissue, embedded in 4% agarose in CO<sub>2</sub> independent medium  
468 (ThermoFisher) and sectioned with vibratome. Sections were blocked in 5% FBS in  
469 CO<sub>2</sub> independent medium and stained with anti-CD201 antibody. 2hr fixation in 4%  
470 PFA/PBS followed prior to the addition of secondary antibody. Mounting medium  
471 containing DAPI (Sigma-Aldrich) was used to stain the nuclei. Images were acquired  
472 with a Leica TCS SP8X White Light Laser confocal system.

473 For histopathology, colon tissues were fixed in 10% formalin and embedded in  
474 paraffin. FFPE sections were stained with hematoxylin (Sigma-Aldrich) and eosin  
475 (Sigma-Aldrich) and colitis score assessment was performed as previously described  
476 [40]. Stainings for epithelial cell differentiation markers were performed in FFPE  
477 section using the antibodies listed in Supplemental Table S1. Signal detection and  
478 development were performed using Vectastain ABC-HRP Kit and ImmPACT DAB  
479 kit (Vector laboratories). Quantification of proliferating cells was performed in mice  
480 that were injected i.p. with 100 mg/kg BrdU (Sigma-Aldrich) 2h prior to sacrificing  
481 them, using the BrdU detection kit (BD), according to the manufacturer's instructions.  
482 The number of BrdU<sup>+</sup> cells was quantified in at least 30 intact, well-oriented crypts  
483 per mouse.

484



## 485 **FACS analysis and sorting**

486 Intestinal tissue preparations were prepared as previously described [21]. Briefly,  
487 colon or small intestine was removed, flushed with HBSS (Gibco), containing  
488 antibiotic-antimycotic solution (Gibco) and cut into pieces. Intestinal pieces were  
489 incubated with HBSS, containing 5mM EDTA, DTT and Penicillin/Streptomycin  
490 (Gibco) for 30 min, at 37°C, to remove epithelial cells. After vigorous shaking, the  
491 remaining pieces were digested using 300 U/ml Collagenase XI (Sigma-Aldrich), 1  
492 mg/ml Dispase II (Roche) and 100 U/ml Dnase I (Sigma-Aldrich) for 40-60 minutes  
493 at 37°C. For embryos, the intestine of the embryos was isolated, cut into pieces and  
494 digested using 100 µg/ml Collagenase P (Roche), 800 µg/ml Dispase II (Roche), 200  
495 µg/ml Dnase I (Sigma-Aldrich) for 20 min at 37°C. The cell suspension was passed  
496 through a 70µm strainer, centrifuged and resuspended in FACS buffer (PBS with 2%  
497 FBS). For stainings, 1-2 million cells/ 100µl were incubated with the antibodies  
498 shown in Supplemental Table S1. For intracellular stainings, cells were fixed and  
499 permeabilized using the Fixation and Permeabilization Buffer Set (eBioscience),  
500 according to manufacturer's instructions. Propidium Iodide (Sigma) or the Zombie-  
501 NIR Fixable Viability Kit (Biolegend) was used for live-dead cell discrimination.  
502 Samples were analyzed using the FACSCanto II flow cytometer (BD) or the  
503 FACS Aria III cell sorter (BD) and the FACSDiva (BD) or FlowJo software (FlowJo,  
504 LLC).

505

506 **Table 1. Antibodies used in flow cytometry and immunohistochemistry.**

| Antibody against | Conjugate     | Clone/Cat. Number | Company     | Use |
|------------------|---------------|-------------------|-------------|-----|
| CD45             | APC/Cy7       | 30-F11            | BioLegend   | FC  |
| CD45             | A700          | 30-F11            | BioLegend   | FC  |
| CD326 (EpCAM)    | APC-eFluor780 | G8.8              | eBioscience | FC  |

|                                  |                      |            |               |         |
|----------------------------------|----------------------|------------|---------------|---------|
| CD326 (EpCAM)                    | Unconjugated         | G8.8       | eBioscience   | IHC     |
| Ter119                           | Biotin               | TER-119    | eBioscience   | FC      |
| Ter119                           | APC-eFluor780        | TER-119    | eBioscience   | FC      |
| CD31                             | Biotin               | MEC13.3    | BD Pharmingen | FC      |
| CD31                             | APC/Fire 750         | 390        | BioLegend     | FC      |
| Podoplanin                       | PE/Cy7               | 8.1.1      | BioLegend     | FC      |
| Podoplanin                       | Unconjugated         | 14-5381-81 | eBioscience   | IHC     |
| PDGFR $\alpha$ (CD140 $\alpha$ ) | Unconjugated         | #AF1062    | R&D Systems   | IHC     |
| PDGFR $\alpha$ (CD140 $\alpha$ ) | APC                  | APA5       | eBioscience   | FC      |
| $\alpha$ -SMA                    | FITC                 | 1A4        | Sigma         | FC, IHC |
| $\alpha$ -SMA                    | eFluor660            | 1A4        | Invitrogen    | FC, IHC |
| $\alpha$ -SMA                    | Cy3                  | 1A4        | Sigma         | IHC     |
| CD201                            | APC                  | eBio1560   | eBioscience   | FC, IHC |
| CD201                            | PE/Cy5               | eBio1560   | Invitrogen    | FC, IHC |
| CD34                             | Biotin               | RAM34      | eBioscience   | FC, IHC |
| Streptavidin                     | A750                 | S21384     | Invitrogen    | FC      |
| Streptavidin                     | A647                 | S32357     | Invitrogen    | FC      |
| Streptavidin                     | PE                   | 554061     | BD Pharmingen | FC      |
| Streptavidin                     | Brilliant Violet 421 | 405225     | BioLegend     | FC      |
| Rabbit IgG                       | A647                 | A21244     | Invitrogen    | IHC     |
| Rat IgG                          | A594                 | A11007     | Invitrogen    | IHC     |
| Rat IgG                          | A647                 | A21247     | Invitrogen    | IHC     |
| Goat IgG                         | A647                 | A11056     | Invitrogen    | IHC     |
| Hamster IgG                      | A647                 | A21451     | Invitrogen    | IHC     |
| Dcl1                             | Unconjugated         | Ab109029   | Abcam         | IHC     |
| ChgA                             | Unconjugated         | Ab15160    | Abcam         | IHC     |
| Ki67                             | Unconjugated         | Ab15580    | Abcam         | IHC     |
| BrdU                             | APC                  | 552598     | BD Pharmingen | FC      |

507 \*FC, Flow Cytometry; IHC, Immunohistochemistry

508

### 509 **Crypt isolation and co-culture with IMCs**

510 Intestinal crypts were isolated as described previously [42]. Briefly, the small  
511 intestine was flushed with cold PBS (Gibco), opened longitudinally and villi were  
512 scraped off using a coverslip. Then, it was cut into 5mm pieces and washed  
513 extensively until the supernatant was clear. Ice-cold crypt isolation buffer (2 mM  
514 EDTA in PBS) was added to the fragments and stirred for 1 hour at 4°C. Fragments  
515 were allowed to settle down, the supernatant was removed and ice-cold 2 mM  
516 EDTA/PBS was added followed by pipetting up and down. Released crypts were  
517 passed through a 70- $\mu$ m-cell strainer and the procedure was repeated until most of

518 crypts were released. Crypt fractions were centrifuged at 300g for 5 minutes and  
519 resuspended with ice-cold basal culture medium (Advanced DMEM/F12 (Gibco)  
520 supplemented with 2 mM GlutaMax (Gibco), 10 mM HEPES (Gibco) and 100 U/mL  
521 penicillin/ 100 mg/mL streptomycin (Gibco). Crypts were centrifuged again at 200g  
522 for 5 minutes, resuspended in warm basal culture medium and counted. Crypts were  
523 mixed with ColVIcre-GFP<sup>+</sup> and GFP<sup>-</sup> IMCs sorted by FACS at passage 1 and  
524 subsequently resuspended in Matrigel (BD Biosciences) at 250 crypts/50.000  
525 IMCs/30 µl in 48-well plates. After Matrigel polymerization, culture medium was  
526 added in the wells, consisting of DMEM/F12 medium (Gibco), Glutamax (Gibco),  
527 Penicillin/Streptomycin, N2 supplement (Life Technologies, 1×), B27 supplement  
528 (Life Technologies, 1×), and 1 mM N-acetylcysteine (Sigma-Aldrich), 50 ng/ml EGF  
529 (Life Technologies), 100 ng/ml Noggin (PeproTech) and Rspo1 (PeproTech) where  
530 indicated. Images were acquired with the Zeiss Axio Observer Z1 microscope.  
531 Organoid measurements were performed using the ImageJ/Fiji software.

532

### 533 **RNA isolation and qRT-PCR**

534 RNA was isolated using the RNeasy mini kit or the RNeasy micro kit (Qiagen),  
535 depending on the number of cells, according to the manufacturer's instruction. 100ng-  
536 1µg of RNA was used to generate cDNA using the MMLV reverse transcriptase by  
537 Promega and oligo-dT primers (Promega), according to the manufacturer's  
538 instructions. For qRT-PCR, the SYBR Green PCR Master Mix (Invitrogen) was used  
539 according to the manufacturer's instructions. Forward and reverse primers were added  
540 at a concentration of 0.2 pmol/ml in a final volume of 20 µl and qRT-PCR was  
541 performed on a CFX96 Touch™ Real-Time PCR Detection System (Bio-Rad). The  
542 primer list can be found in Table 2.

543

544

545 **Table 2. List of primers used for real-time PCR.**

| Gene         | Sequence (5'— 3')                                      | Product (bp) |
|--------------|--------------------------------------------------------|--------------|
| <i>Bmp2</i>  | F: ACCCCCAGCAAGGACGTCGT<br>R: TGGAAGCTGCGCACGGTGTT     | 137          |
| <i>Bmp3</i>  | F: TTTGCTGATATCGGCTGGAG<br>R: TGGTGGCGTGATTTGATG       | 125          |
| <i>Bmp4</i>  | F: CCCGCAGAAGGGCCAAAC<br>R: TAGCCGGGTGGGGCCACAAT       | 138          |
| <i>Bmp5</i>  | F: ACCTCTTGCCAGCCTACATG<br>R: TGCTGCTGTCAGTCTTCTC      | 169          |
| <i>Bmp7</i>  | F: TCCAAGACGCCAAAGAACCA<br>R: TGCAATGATCCAGTCCTGCC     | 140          |
| <i>Wnt5a</i> | F: GGTGCCATGTCTTCCAAGTT<br>R: TGAGAAAGTCCTGCCAGTTG     | 176          |
| <i>Ednrb</i> | F: TTGCGAGAGGCCTGTTTAGG<br>R: GAGACCAACTCGTGCGGATT     | 136          |
| <i>Cspg4</i> | F: GGATGCCTCCAGGTCAGACT<br>R: CTCCGTCAACAGACAGCACA     | 142          |
| <i>Casq2</i> | F: GCCCAACGTCATCCCTAACA<br>R: CCCATTCAAGTCGTCTTCCCAT   | 133          |
| <i>Kcnj8</i> | F: CAAACCCGAGTCTGAGGACG<br>R: TTCCTTTCACCATAGCCCGC     | 81           |
| <i>Foxl1</i> | F: ATAAACCAGGCTCCCCTTTG<br>R: AGCCAAAGTACGTGCCAAAC     | 75           |
| <i>ChgA</i>  | F: CCAAGGTGATGAAGTGCGTC<br>R: GGTGTCGCAGGATAGAGAGGA    | 129          |
| <i>Lgr5</i>  | F: CCTACTCGAAGACTTACCCAGT<br>R: GCATTGGGGTGAATGATAGCA  | 165          |
| <i>Ascl2</i> | F: AAGCACACCTTGACTGGTACG<br>R: AAGTGGACGTTTGCACCTTCA   | 115          |
| <i>Hprt</i>  | F: TGCCGAGGATTTGGAAAAAGTG<br>R: CACAGAGGGCCACAATGTGATG | 116          |
| <i>Cox6c</i> | F: CTGAGCCAAGAAAGAAGGCG<br>R: TGAACCTCTTTGGAGCGCAA     | 149          |
| <i>B2m</i>   | F: TTCTGGTGCTTGTCTCACTGA<br>R: CAGTATGTTCCGCTTCCCATTC  | 103          |

546

547

548 **3' RNAseq sequencing and analysis**

549 The quantity and quality of RNA samples from sorted cells were analyzed using the

550 bioanalyzer form Agilent in combination with the Agilent RNA 6000 Nano. RNA

551 samples with RNA Integrity Number (RIN) > 7 were further used for library  
552 preparation using the 3' mRNA-Seq Library Prep Kit Protocol for Ion Torrent  
553 (QuantSeq-LEXOGEN™) according to manufacturer's instructions. The quantity and  
554 quality of libraries were assessed using the DNA High Sensitivity Kit in the  
555 bioanalyzer, according to the manufacturer's instructions (Agilent). Libraries were  
556 subsequently pooled and templated using the Ion PI IC200 Chef Kit (ThermoFisher  
557 Scientific) on an Ion Proton Chef Instrument or Ion One Touch System. Sequencing  
558 was performed using the Ion PI™ Sequencing 200 V3 Kit and Ion Proton PI™ V2  
559 chips (ThermoFisher Scientific) on an Ion Proton™ System, according to the  
560 manufacturer's instructions. The RNA-Seq FASTQ files were mapped using  
561 TopHat2 [43], with default settings and using additional transcript annotation data  
562 for the mm10 genome from Illumina iGenomes  
563 ([https://support.illumina.com/sequencing/sequencing\\_software/igenome.html](https://support.illumina.com/sequencing/sequencing_software/igenome.html)).  
564 According to the Ion Proton manufacturers recommendation, the reads which  
565 remained unmapped were submitted to a second round of mapping using Bowtie2  
566 [44] against the mm10 genome with the very-sensitive switch turned on and  
567 merged with the initial mappings. Through metaseqR R package [45],  
568 GenomicRanges and DESeq were employed in order to summarize bam files of the  
569 previous step to read counts table and to perform differential expression analysis  
570 (after removing genes that had zero counts over all the RNA-Seq samples).

571 Downstream bioinformatics analysis and visualization tasks were performed using  
572 InteractiveVenn for Venn diagrams ([www.interactivenn.net](http://www.interactivenn.net)) [46] and the Functional  
573 Annotation tool from DAVID for Gene Ontologies ([david.ncifcrf.gov](http://david.ncifcrf.gov)) [47, 48].  
574 Volcano plots and heatmaps were generated in R using an in-house developed script  
575 utilizing the packages ggplot2, gplots and pheatmap (<https://cran.r->

576 [project.org/web/packages/pheatmap/index.html](https://www.ncbi.nlm.nih.gov/geo/query/acc.cgi?acc=GSE117308)) [49-51]. RNA-seq datasets have been  
577 deposited in NCBI's Gene Expression Omnibus [52] and are accessible through the  
578 GEO Series accession number GSE117308.

579

### 580 **Comparison with single cell datasets**

581 The positive cluster marker genes of the healthy and DSS treated mouse, from the  
582 public dataset GSE114374, were used as gene signatures for each cell type identified  
583 in the single cell analysis. For each gene of a signature z-scores of log<sub>2</sub> normalized  
584 expression values were calculated for the bulk RNA-seq samples GC(GC1, GC2,  
585 GC3), TC(TC1, TC2, TC3), UC(UC1, UC2, UC3) and GDS(GDS1, GDS2, GDS3),  
586 TDS(TDS1, TDS2, TDS3), UDS(UDS1, UDS2, UDS3). In the boxplots of Figure 1G  
587 and 5D the mean z-score of GC1, GC2, GC3 and GDS1, GDS2, GDS3 are displayed  
588 respectively.

589

### 590 **Statistical analysis**

591 Data are presented as mean  $\pm$  SD. Statistical significance was calculated by Student's  
592 t-test or one-way ANOVA for multiple comparisons. The D'Agostino Pearson test  
593 was used to test if the dataset followed a normal distribution. Welch's correction was  
594 used for samples that showed unequal variance. P-values  $\leq$  0.05 were considered  
595 significant. Data were analysed using the GraphPad Prism 8 software.

596

### 597 **Acknowledgements**

598 We would like to thank Michalis Meletiou for mouse genotyping. We would also like  
599 to thank the Genomics Facility of BSRC "Alexander Fleming", and specifically

600 Vaggelis Harokopos for performing all RNA sequencing experiments and Martin  
601 Reczko and Panagiotis Moulos for initial bioinformatics analyses. We acknowledge  
602 support of this work by the InfrafrontierGR Infrastructure, co-funded by Greece and  
603 the European Union (European Regional Development Fund), under NSRF 2014-  
604 2020, MIS 5002135), which provided mouse hosting and phenotyping facilities,  
605 including, histopathology, flow cytometry, and advanced microscopy facilities. This  
606 work was supported by a grant from the Stavros Niarchos Foundation to the BSRC  
607 “Alexander Fleming” as part of the Foundation’s initiative to support the Greek  
608 research center ecosystem, a grant from the Hellenic Foundation for Research &  
609 Innovation (H.F.R.I.) to MES (Grant No 1687), the FP7 Advanced ERC grant MCs-  
610 inTEST (Grant Agreement No 340217) to GK, a grant from the European Crohn’s  
611 and Colitis Organisation to VK and a grant from the Fondation Sante to VK.

612

613

614 **References**

- 615 [1] Gehart H, Clevers H. Tales from the crypt: new insights into intestinal stem  
616 cells. *Nat Rev Gastroenterol Hepatol* 2019;16(1):19-34.
- 617 [2] de Sousa E Melo F, de Sauvage FJ. Cellular Plasticity in Intestinal  
618 Homeostasis and Disease. *Cell Stem Cell* 2019;24(1):54-64.
- 619 [3] Powell DW, Pinchuk IV, Saada JI, Chen X, Mifflin RC. Mesenchymal cells of  
620 the intestinal lamina propria. *Annu Rev Physiol* 2011;73:213-37.
- 621 [4] McCarthy N, Kraiczy J, Shivdasani RA. Cellular and molecular architecture of  
622 the intestinal stem cell niche. *Nat Cell Biol* 2020;22(9):1033-41.
- 623 [5] Kabiri Z, Greicius G, Madan B, Biechele S, Zhong Z, Zaribafzadeh H, Edison,  
624 Aliyev J, Wu Y, Bunte R, Williams BO, Rossant J, Virshup DM. Stroma  
625 provides an intestinal stem cell niche in the absence of epithelial Wnts.  
626 *Development* 2014;141(11):2206-15.
- 627 [6] Aoki R, Shoshkes-Carmel M, Gao N, Shin S, May CL, Golson ML, Zahm  
628 AM, Ray M, Wiser CL, Wright CV, Kaestner KH. Foxl1-expressing  
629 mesenchymal cells constitute the intestinal stem cell niche. *Cell Mol*  
630 *Gastroenterol Hepatol* 2016;2(2):175-88.
- 631 [7] McCarthy N, Manieri E, Storm EE, Saadatpour A, Luoma AM, Kapoor VN,  
632 Madha S, Gaynor LT, Cox C, Keerthivasan S, Wucherpfennig K, Yuan GC,  
633 de Sauvage FJ, Turley SJ, Shivdasani RA. Distinct Mesenchymal Cell  
634 Populations Generate the Essential Intestinal BMP Signaling Gradient. *Cell*  
635 *Stem Cell* 2020;26(3):391-402.e5.
- 636 [8] Kosinski C, Li VS, Chan AS, Zhang J, Ho C, Tsui WY, Chan TL, Mifflin RC,  
637 Powell DW, Yuen ST, Leung SY, Chen X. Gene expression patterns of human



- 638 colon tops and basal crypts and BMP antagonists as intestinal stem cell niche  
639 factors. *Proc Natl Acad Sci U S A* 2007;104(39):15418-23.
- 640 [9] Beumer J, Artegiani B, Post Y, Reimann F, Gribble F, Nguyen TN, Zeng H,  
641 Van den Born M, Van Es JH, Clevers H. Enteroendocrine cells switch  
642 hormone expression along the crypt-to-villus BMP signalling gradient. *Nat*  
643 *Cell Biol* 2018;20(8):909-16.
- 644 [10] Walton KD, Freddo AM, Wang S, Gumucio DL. Generation of intestinal  
645 surface: an absorbing tale. *Development* 2016;143(13):2261-72.
- 646 [11] Koliaraki V, Prados A, Armaka M, Kollias G. The mesenchymal context in  
647 inflammation, immunity and cancer. *Nat Immunol* 2020;21(9):974-82.
- 648 [12] Greicius G, Kabiri Z, Sigmundsson K, Liang C, Bunte R, Singh MK, Virshup  
649 DM. PDGFRalpha(+) pericryptal stromal cells are the critical source of Wnts  
650 and RSPO3 for murine intestinal stem cells in vivo. *Proc Natl Acad Sci U S A*  
651 2018;115(14):E3173-E81.
- 652 [13] Shoshkes-Carmel M, Wang YJ, Wangenstein KJ, Tóth B, Kondo A, Massasa  
653 EE, Itzkovitz S, Kaestner KH. Subepithelial telocytes are an important source  
654 of Wnts that supports intestinal crypts. *Nature* 2018;557(7704):242-6.
- 655 [14] Kinchen J, Chen HH, Parikh K, Antanaviciute A, Jagielowicz M, Fawkner-  
656 Corbett D, Ashley N, Cubitt L, Mellado-Gomez E, Attar M, Sharma E, Wills  
657 Q, Bowden R, Richter FC, Ahern D, Puri KD, Henault J, Gervais F, Koohy H,  
658 Simmons A. Structural Remodeling of the Human Colonic Mesenchyme in  
659 Inflammatory Bowel Disease. *Cell* 2018;175(2):372-86.e17.
- 660 [15] Smillie CS, Biton M, Ordovas-Montanes J, Sullivan KM, Burgin G, Graham  
661 DB, Herbst RH, Rogel N, Slyper M, Waldman J, Sud M, Andrews E, Velonias  
662 G, Haber AL, Jagadeesh K, Vickovic S, Yao J, Stevens C, Dionne D, Nguyen

- 663 LT, Villani AC, Hofree M, Creasey EA, Huang H, Rozenblatt-Rosen O,  
664 Garber JJ, Khalili H, Desch AN, Daly MJ, Ananthakrishnan AN, Shalek AK,  
665 Xavier RJ, Regev A. Intra- and Inter-cellular Rewiring of the Human Colon  
666 during Ulcerative Colitis. *Cell* 2019;178(3):714-30.e22.
- 667 [16] Kim JE, Fei L, Yin WC, Coquenlorge S, Rao-Bhatia A, Zhang X, Shi SSW,  
668 Lee JH, Hahn NA, Rizvi W, Kim KH, Sung HK, Hui CC, Guo G, Kim TH.  
669 Single cell and genetic analyses reveal conserved populations and signaling  
670 mechanisms of gastrointestinal stromal niches. *Nat Commun* 2020;11(1):334.
- 671 [17] Stzepourginski I, Nigro G, Jacob JM, Dulauroy S, Sansonetti PJ, Eberl G,  
672 Peduto L. CD34+ mesenchymal cells are a major component of the intestinal  
673 stem cells niche at homeostasis and after injury. *Proc Natl Acad Sci U S A*  
674 2017;114(4):E506-E13.
- 675 [18] Degirmenci B, Valenta T, Dimitrieva S, Hausmann G, Basler K. GLI1-  
676 expressing mesenchymal cells form the essential Wnt-secreting niche for  
677 colon stem cells. *Nature* 2018;558(7710):449-53.
- 678 [19] Bahar Halpern K, Massalha H, Zwick RK, Moor AE, Castillo-Azofeifa D,  
679 Rozenberg M, Farack L, Egozi A, Miller DR, Averbukh I, Harnik Y,  
680 Weinberg-Corem N, de Sauvage FJ, Amit I, Klein OD, Shoshkes-Carmel M,  
681 Itzkovitz S. Lgr5+ telocytes are a signaling source at the intestinal villus tip.  
682 *Nat Commun* 2020;11(1):1936.
- 683 [20] Martin JC, Chang C, Boschetti G, Ungaro R, Giri M, Grout JA, Gettler K,  
684 Chuang LS, Nayar S, Greenstein AJ, Dubinsky M, Walker L, Leader A, Fine  
685 JS, Whitehurst CE, Mbow ML, Kugathasan S, Denson LA, Hyams JS,  
686 Friedman JR, Desai PT, Ko HM, Laface I, Akturk G, Schadt EE, Salmon H,  
687 Gnjatic S, Rahman AH, Merad M, Cho JH, Kenigsberg E. Single-Cell

- 688 Analysis of Crohn's Disease Lesions Identifies a Pathogenic Cellular Module  
689 Associated with Resistance to Anti-TNF Therapy. *Cell* 2019;178(6):1493-  
690 508.e20.
- 691 [21] Koliaraki V, Pasparakis M, Kollias G. IKKbeta in intestinal mesenchymal  
692 cells promotes initiation of colitis-associated cancer. *J Exp Med*  
693 2015;212(13):2235-51.
- 694 [22] Muzumdar MD, Tasic B, Miyamichi K, Li L, Luo L. A global double-  
695 fluorescent Cre reporter mouse. *Genesis* 2007;45(9):593-605.
- 696 [23] Prados A, Kollias G, Koliaraki V. CollagenVI-Cre mice: A new tool to target  
697 stromal cells in secondary lymphoid organs. *Sci Rep* 2016;6:33027.
- 698 [24] Walton KD, Kolterud A, Czerwinski MJ, Bell MJ, Prakash A, Kushwaha J,  
699 Grosse AS, Schnell S, Gumucio DL. Hedgehog-responsive mesenchymal  
700 clusters direct patterning and emergence of intestinal villi. *Proc Natl Acad Sci*  
701 U S A 2012;109(39):15817-22.
- 702 [25] Walton KD, Whidden M, Kolterud A, Shoffner SK, Czerwinski MJ,  
703 Kushwaha J, Parmar N, Chandrasekhar D, Freddo AM, Schnell S, Gumucio  
704 DL. Villification in the mouse: Bmp signals control intestinal villus patterning.  
705 *Development* 2016;143(3):427-36.
- 706 [26] Karlsson L, Lindahl P, Heath JK, Betsholtz C. Abnormal gastrointestinal  
707 development in PDGF-A and PDGFR-(alpha) deficient mice implicates a  
708 novel mesenchymal structure with putative instructive properties in villus  
709 morphogenesis. *Development* 2000;127(16):3457-66.
- 710 [27] Buch T, Heppner FL, Tertilt C, Heinen TJ, Kremer M, Wunderlich FT, Jung  
711 S, Waisman A. A Cre-inducible diphtheria toxin receptor mediates cell lineage  
712 ablation after toxin administration. *Nat Methods* 2005;2(6):419-26.

- 713 [28] Qi Z, Li Y, Zhao B, Xu C, Liu Y, Li H, Zhang B, Wang X, Yang X, Xie W, Li  
714 B, Han J-DJ, Chen Y-G. BMP restricts stemness of intestinal Lgr5 + stem  
715 cells by directly suppressing their signature genes. *Nature Communications*  
716 2017;8(1):1-14.
- 717 [29] Brügger MD, Valenta T, Fazilaty H, Hausmann G, Basler K. Distinct  
718 populations of crypt-associated fibroblasts act as signaling hubs to control  
719 colon homeostasis. *PLoS Biol* 2020;18(12):e3001032.
- 720 [30] Armaka M, Apostolaki M, Jacques P, Kontoyiannis DL, Elewaut D, Kollias  
721 G. Mesenchymal cell targeting by TNF as a common pathogenic principle in  
722 chronic inflammatory joint and intestinal diseases. *J Exp Med*  
723 2008;205(2):331-7.
- 724 [31] Shyer AE, Tallinen T, Nerurkar NL, Wei Z, Gil ES, Kaplan DL, Tabin CJ,  
725 Mahadevan L. Villification: how the gut gets its villi. *Science*  
726 2013;342(6155):212-8.
- 727 [32] Shyer AE, Huycke TR, Lee C, Mahadevan L, Tabin CJ. Bending gradients:  
728 how the intestinal stem cell gets its home. *Cell* 2015;161(3):569-80.
- 729 [33] Roulis M, Kaklamanos A, Scherthanner M, Bielecki P, Zhao J, Kaffe E,  
730 Frommelt L-S, Qu R, Knapp MS, Henriques A, Chalkidi N, Koliaraki V, Jiao  
731 J, Brewer R, Bacher M, Blackburn HN, Zhao X, Breyer RM, Aidinis V, Jain  
732 D, Su B, Herschman HR, Kluger Y, Kollias G, Flavell RA. Paracrine  
733 orchestration of intestinal tumorigenesis by a confined mesenchymal niche.  
734 *Nature* 2020.
- 735 [34] Kaestner KH, Silberg DG, Traber PG, Schütz G. The mesenchymal winged  
736 helix transcription factor Fkh6 is required for the control of gastrointestinal  
737 proliferation and differentiation. *Genes Dev* 1997;11(12):1583-95.

- 738 [35] Holloway EM, Czerwinski M, Tsai YH, Wu JH, Wu A, Childs CJ, Walton  
739 KD, Sweet CW, Yu Q, Glass I, Treutlein B, Camp JG, Spence JR. Mapping  
740 Development of the Human Intestinal Niche at Single-Cell Resolution. *Cell*  
741 *Stem Cell* 2020.
- 742 [36] Kim HS, Neugebauer J, McKnite A, Tilak A, Christian JL. BMP7 functions  
743 predominantly as a heterodimer with BMP2 or BMP4 during mammalian  
744 embryogenesis. *Elife* 2019;8.
- 745 [37] Worthley DL, Churchill M, Compton JT, Tailor Y, Rao M, Si Y, Levin D,  
746 Schwartz MG, Uygur A, Hayakawa Y, Gross S, Renz BW, Setlik W, Martinez  
747 AN, Chen X, Nizami S, Lee HG, Kang HP, Caldwell JM, Asfaha S,  
748 Westphalen CB, Graham T, Jin G, Nagar K, Wang H, Kheirbek MA, Kolhe A,  
749 Carpenter J, Glaire M, Nair A, Renders S, Manieri N, Muthupalani S, Fox JG,  
750 Reichert M, Giraud AS, Schwabe RF, Pradere JP, Walton K, Prakash A,  
751 Gumucio D, Rustgi AK, Stappenbeck TS, Friedman RA, Gershon MD, Sims  
752 P, Grikscheit T, Lee FY, Karsenty G, Mukherjee S, Wang TC. Gremlin 1  
753 identifies a skeletal stem cell with bone, cartilage, and reticular stromal  
754 potential. *Cell* 2015;160(1-2):269-84.
- 755 [38] Wirtz S, Popp V, Kindermann M, Gerlach K, Weigmann B, Fichtner-Feigl S,  
756 Neurath MF. Chemically induced mouse models of acute and chronic  
757 intestinal inflammation. *Nat Protoc* 2017;12(7):1295-309.
- 758 [39] Koliaraki V, Kollias G. Isolation of intestinal mesenchymal cells from adult  
759 mice. *Bio-protocol* 2016;6(18):e1940.
- 760 [40] Koliaraki V, Roulis M, Kollias G. Tpl2 regulates intestinal myofibroblast  
761 HGF release to suppress colitis-associated tumorigenesis. *J Clin Invest*  
762 2012;122(11):4231-42.

- 763 [41] Hama H, Kurokawa H, Kawano H, Ando R, Shimogori T, Noda H, Fukami K,  
764 Sakaue-Sawano A, Miyawaki A. Scale: a chemical approach for fluorescence  
765 imaging and reconstruction of transparent mouse brain. *Nat Neurosci*  
766 2011;14(11):1481-8.
- 767 [42] Sato T, Vries RG, Snippert HJ, van de Wetering M, Barker N, Stange DE, van  
768 Es JH, Abo A, Kujala P, Peters PJ, Clevers H. Single Lgr5 stem cells build  
769 crypt-villus structures in vitro without a mesenchymal niche. *Nature*  
770 2009;459(7244):262-5.
- 771 [43] Kim D, Pertea G, Trapnell C, Pimentel H, Kelley R, Salzberg SL. TopHat2:  
772 accurate alignment of transcriptomes in the presence of insertions, deletions  
773 and gene fusions. *Genome Biol* 2013;14(4):R36.
- 774 [44] Langmead B, Salzberg SL. Fast gapped-read alignment with Bowtie 2. *Nat*  
775 *Methods* 2012;9(4):357-9.
- 776 [45] Moulos P, Hatzis P. Systematic integration of RNA-Seq statistical algorithms  
777 for accurate detection of differential gene expression patterns. *Nucleic Acids*  
778 *Res* 2015;43(4):e25.
- 779 [46] Heberle H, Meirelles GV, da Silva FR, Telles GP, Minghim R. InteractiVenn:  
780 a web-based tool for the analysis of sets through Venn diagrams. *BMC*  
781 *Bioinformatics* 2015;16:169.
- 782 [47] Huang da W, Sherman BT, Lempicki RA. Bioinformatics enrichment tools:  
783 paths toward the comprehensive functional analysis of large gene lists.  
784 *Nucleic Acids Res* 2009;37(1):1-13.
- 785 [48] Huang da W, Sherman BT, Lempicki RA. Systematic and integrative analysis  
786 of large gene lists using DAVID bioinformatics resources. *Nat Protoc*  
787 2009;4(1):44-57.

- 788 [49] Wickham H. *ggplot2: Elegant Graphics for Data Analysis*. New York:  
789 Springer Publishing Company, Incorporated. 2016.
- 790 [50] Warnes GR, Bolker B, Bonebakker L, Gentleman R, Huber W, Liaw A,  
791 Lumley T, Maechler M, Magnusson A, Moeller S, Schwartz M, Venables B.  
792 *gplots: Various R Programming Tools for Plotting Data*. 2016.
- 793 [51] Team RC. *R: A language and environment for statistical computing*. R  
794 Foundation for Statistical Computing. Vienna, Austria. 2017.
- 795 [52] Edgar R, Domrachev M, Lash AE. Gene Expression Omnibus: NCBI gene  
796 expression and hybridization array data repository. *Nucleic Acids Res*  
797 *2002;30(1):207-10*.
- 798

799 **Figure Legends**

800 **Figure 1. The *Col6a1*<sup>Cre</sup> mouse targets CD34<sup>+</sup> IMCs in the mouse colon.** A) FACS  
801 sorting strategy for the isolation of *Col6a1*<sup>Cre</sup>-GFP<sup>+</sup> (GC) and *Col6a1*<sup>Cre</sup>-GFP<sup>-</sup> (TC)  
802 mesenchymal cells from the colon. Single cell preparations from the colon (UC) were  
803 stained for the Lin<sup>+</sup> markers CD45, EpCAM, CD31 and Ter119 and Propidium Iodide  
804 (PI) for dead cell exclusion. 3 samples from 4-5 mice each were subsequently  
805 analyzed. B) Heatmap of differentially expressed genes in GC vs TC and UC samples,  
806 corresponding to GO terms related to epithelial proliferation/differentiation and blood  
807 vessel regulation. Log<sub>2</sub> transformed normalized read counts of genes are shown. Read  
808 counts are scaled per column, red denotes high expression and blue low expression  
809 values. C) Representative FACS analysis of CD34 expression in Lin<sup>-</sup> cells in the  
810 colon of *Col6a1*<sup>mTmG</sup> mice (n = 4-5 mice). D) Immunohistochemical analysis for  
811 CD34 expression in the colon of *Col6a1*<sup>mTmG</sup> mice (n = 9-10 mice, Scale bar: 50 μm).  
812 E) Total number and size of intestinal structures after 3 days of co-culture with sorted  
813 *Col6a1*-GFP<sup>+</sup> and GFP<sup>-</sup> IMCs, with and without R-Spondin 1, respectively. Data  
814 represents mean ± SEM from one of four experiments performed in quadruplicates.  
815 \*p<0.05, \*\*p<0.01, \*\*\*p<0.001. F) Representative bright-field images of intestinal  
816 organoids co-cultured with *Col6a1*-GFP<sup>+</sup> and GFP<sup>-</sup> IMCs at day 3, in the absence of  
817 R-Spondin 1 (Scale bar: 100 μm). G) Mean expression (z-score) of genes signatures  
818 extracted from the different intestinal mesenchymal clusters identified in Kinchen et  
819 al., [14] in *Col6a1*-GFP<sup>+</sup> bulk RNA-seq samples. MF, myofibroblasts; SMC, smooth  
820 muscle cells. H) Heatmap of the top 50 differentially expressed genes in the Str2  
821 population (Kinchen et al., [14]) and their relative expression in the GC and TC  
822 samples.

823



824 **Figure 2. GFP<sup>+</sup>/CD201<sup>+</sup> mesenchymal cells comprise distinct subsets in the**  
825 **mouse colon.** A) Immunohistochemistry for CD201 in the colon of *Col6a1<sup>mTmG</sup>* mice  
826 (n = 4 mice, Scale bar: 50  $\mu$ m). The dotted line delimitates the epithelial surface  
827 towards the lumen. B) Representative FACS analysis of CD201 expression in Lin<sup>-</sup>  
828 cells in the colon of *Col6a1<sup>mTmG</sup>* mice (n = 10 mice). C) Gene expression analysis of  
829 selected genes in FACS-sorted GFP<sup>+</sup>CD201<sup>+</sup>, GFP<sup>+</sup>CD201<sup>-</sup> and GFP<sup>-</sup> colonic  
830 mesenchymal cells from *Col6a1<sup>mTmG</sup>* mice. Expression is measured in relation to the  
831 *Hprt* housekeeping gene (n = 3), \*p<0.05, \*\*p<0.01, \*\*\*p<0.001. D) tSNE plots  
832 showing the expression of CD34, CD201, PDGFR $\alpha$  and  $\alpha$ SMA in Lin<sup>-</sup> colonic  
833 mesenchymal cells using FACS analysis (n = 8 mice). E) Immunohistochemistry for  
834  $\alpha$ SMA and CD31 in the colon of *Col6a1<sup>mTmG</sup>* mice, showing their localization around  
835 blood vessels (white arrow) (Scale bar: 50  $\mu$ m). The bottom of crypts is shown. F)  
836 Immunohistochemistry for PDGFR $\alpha$  and CD34 in the colon of *Col6a1<sup>mTmG</sup>* mice.  
837 Different planes are shown. White arrows indicate PDGFR $\alpha^{\text{hi}}$  (upper panel) and  
838 PDGFR $\alpha^{\text{lo}}$  (lower panel) mesenchymal cells (Scale bar: 50  $\mu$ m). The dotted line  
839 delimitates the epithelial surface towards the lumen. G) Confocal imaging of GFP<sup>+</sup>  
840 cells at the top of *Col6a1<sup>mTmG</sup>* colonic crypts (Scale bar: 10  $\mu$ m). H)  
841 Immunohistochemical analysis of PDGFR $\alpha^+$  $\alpha$ SMA<sup>lo</sup> cells in the colon. White arrows  
842 indicate PDGFR $\alpha^{\text{lo}}$  mesenchymal cells. (Scale bar = 10  $\mu$ m) (n = 4 mice for all  
843 analyses). I) Quantification of *Col6a1<sup>Cre</sup>*-GFP<sup>+</sup> cells in each mesenchymal subset.  
844 Only major categories of CD201<sup>-</sup> cells are included (n = 6 mice). K)  
845 Immunohistochemistry for CD31 in the colon of *Col6a1<sup>mTmG</sup>* mice (n = 3 mice, Scale  
846 bar: 10  $\mu$ m).  
847

848 **Figure 3. Intestinal telocytes/SEMFs originate from embryonic mesenchymal cell**  
849 **aggregates and are necessary for intestinal morphogenesis.** Confocal images  
850 showing GFP and PDGFR $\alpha$  expression in A) the small intestine and colon at E15.5  
851 (Scale bar = 50  $\mu$ m) and B) the small intestine and colon of *Col6a1<sup>mTmG</sup>* mice at the  
852 indicated developmental stages (Scale bar = 50  $\mu$ m), (n = 3 mice per developmental  
853 stage). C) Confocal images showing GFP and  $\alpha$ SMA expression in the small intestine  
854 and colon of *Col6a1<sup>mTmG</sup>* mice at the indicated developmental stages (Scale bar = 50  
855  $\mu$ m), (n = 3 mice per developmental stage). D) FACS analysis of *Col6a1*-GFP<sup>+</sup>  
856 intestinal mesenchymal cells at E18.5. E) FACS-based quantification of GFP<sup>+</sup> cells in  
857 PDGFR $\alpha$ <sup>hi</sup> and PDGFR $\alpha$ <sup>lo</sup> cells in E16.5 and E18.5. F) FACS analysis of GFP<sup>+</sup> cells  
858 in E18.5, showing that they all are CD201<sup>+</sup>PDGFR $\alpha$ <sup>hi</sup> cells (n = 3-4 mice per  
859 developmental stage in all FACS analyses). G) Schematic representation of DT  
860 administration. Pregnant females received two injections of diphtheria toxin (DT)  
861 (5 $\mu$ g) at E14.5 and E15.5, which was followed by ex vivo culture of the intestine from  
862 E16.5 to E18.5. H) Lightsheet imaging (maximum projection, Scale bar = 100  $\mu$ m)  
863 and confocal images showing GFP, PDGFR $\alpha$  and  $\alpha$ SMA expression (Scale bar = 50  
864  $\mu$ m) in the small intestine of *Col6a1<sup>DTR</sup>* and control mice. I) quantification of villi/nm  
865 in the presence of DT (n = 7). All (GFP<sup>+</sup> and GFP<sup>-</sup>) and only GFP<sup>-</sup> villi are presented  
866 in DT treated mice. \*\*\*p<0.001, \*\*p<0.01.

867

868 **Figure 4. *Col6a1<sup>Cre+</sup>* cell depletion leads to deregulated epithelial cell**  
869 **differentiation and proliferation during homeostasis.** A) Schematic representation  
870 of DT administration in homeostasis. *Col6a1<sup>DTR</sup>* and control (*Col6a1<sup>mTmG</sup>*, *iDTR<sup>fl/fl</sup>*)  
871 mice received 3 daily intrarectal administrations of DT (20ng/g body weight) and  
872 mice were sacrificed after 5 days. B) Confocal images of GFP expression in

873 *Col6a1<sup>mTmG</sup>* and *Col6a1<sup>DTR</sup>* mice (Scale bar = 50  $\mu$ m). C) FACS analysis and  
874 quantification of GFP<sup>+</sup> cells in the colon of *Col6a1<sup>mTmG</sup>* and *Col6a1<sup>DTR</sup>* mice after DT  
875 administration (n = 9). D) FACS analysis and quantification of PDGFR $\alpha$ <sup>+</sup> subsets in  
876 GFP<sup>+</sup> cells in *Col6a1<sup>mTmG</sup>* and *Col6a1<sup>DTR</sup>* mice (n = 3-5). E) FACS analysis and  
877 quantification of CD201<sup>+</sup>PDGFR $\alpha$ <sup>hi</sup> cells in *Col6a1<sup>mTmG</sup>* and *Col6a1<sup>DTR</sup>* mice (n = 3-4  
878 mice). F) FACS analysis of PDGFR $\alpha$ <sup>+</sup> subsets in *Col6a1<sup>mTmG</sup>* and *Col6a1<sup>DTR</sup>* mice (n  
879 = 4-10). G) H&E staining of *Col6a1<sup>DTR</sup>* and control (*Col6a1<sup>mTmG</sup>*, *iDTR<sup>ff/ff</sup>*) mice  
880 (Scale bar: 100  $\mu$ m). H) Expression analysis of the indicated genes in colon samples  
881 from *Col6a1<sup>DTR</sup>* and control (*Col6a1<sup>mTmG</sup>*, *iDTR<sup>ff/ff</sup>*) mice. Expression is measured in  
882 relation to the *B2m* housekeeping gene (n = 9-14). I) Immunohistochemical-based  
883 quantification of differentiated epithelial cell types per crypt in *Col6a1<sup>DTR</sup>* and control  
884 (*Col6a1<sup>mTmG</sup>*, *iDTR<sup>ff/ff</sup>*) mice (n = 5-13). J) Expression analysis of the indicated genes  
885 in colon samples from *Col6a1<sup>DTR</sup>* and control (*Col6a1<sup>mTmG</sup>*, *iDTR<sup>ff/ff</sup>*) mice. Expression  
886 is measured in relation to the *B2m* housekeeping gene (n = 5-15). K) Representative  
887 BrdU staining and L) quantification of the ratio of BrdU<sup>+</sup> cells in the top/bottom of  
888 the colonic crypts of *Col6a1<sup>DTR</sup>* and control (*Col6a1<sup>mTmG</sup>*, *iDTR<sup>ff/ff</sup>*) mice (Scale bar:  
889 100  $\mu$ m), (n = 6-7). \*p<0.05, \*\*p<0.01, \*\*\*p<0.001.

890

891 **Figure 5. CD34<sup>+</sup> mesenchymal cells compensate for the loss of *Col6a1<sup>Cre+</sup>* cells.** A)  
892 Immunohistochemical and B) FACS analysis of CD34 and PDGFR $\alpha$  expression in the  
893 colon of *Col6a1<sup>DTR</sup>* and *Col6a1<sup>mTmG</sup>* mice (Scale bar = 50  $\mu$ m) (n = 6 mice). A  
894 zoomed-in view of the crypt top is shown in the merged image. C)  
895 Immunohistochemical analysis and D) quantification of Ki67<sup>+</sup> mesenchymal cells in  
896 the colon of *Col6a1<sup>DTR</sup>* and *Col6a1<sup>mTmG</sup>* mice (Scale bar = 50  $\mu$ m) (n = 5 mice). Both  
897 broad and zoomed-in views of the crypt top are shown. E) Immunohistochemical

898 analysis of  $\alpha$ SMA expression in the colon of *Col6a1<sup>DTR</sup>* and control mice (the top of  
899 the crypt is shown) (n = 5). F) FACS analysis and G) quantification of  $\alpha$ SMA<sup>+</sup> cells in  
900 the CD34<sup>+</sup> subset (n = 4 mice), \*\*\*p<0.001.

901

902 **Figure 6. *Col6a1<sup>Cre+</sup>* cells retain their properties and topology during colitis but**  
903 **are dispensable for tissue regeneration.** A) FACS sorting strategy for the isolation  
904 of *Col6a1<sup>Cre</sup>*-GFP<sup>+</sup> (GDS) and *Col6a1<sup>Cre</sup>*-GFP<sup>-</sup> (TDS) mesenchymal cells from the  
905 colon at the end of the acute DSS protocol. 3 samples from 4-5 mice each were  
906 subsequently analyzed. B) Heatmap of differentially expressed genes in GDS vs TDS  
907 and UDS, as well as the respective untreated samples, corresponding to GO terms  
908 related to epithelial proliferation/differentiation, blood vessel regulation and  
909 inflammatory response. Log<sub>2</sub> transformed normalized read counts of genes are  
910 shown. Read counts are scaled per column, red denotes high expression and blue low  
911 expression values. C) Confocal images of GFP expression in *Col6a1<sup>mTmG</sup>* mice at day  
912 8 of the acute DSS protocol, Scale bar = 50  $\mu$ m. D) Mean expression (z-score) of  
913 genes signatures extracted from the different intestinal mesenchymal clusters  
914 identified in Kinchen et al., (14) during DSS colitis in *Col6a1*-GFP<sup>+</sup> bulk RNA-seq  
915 samples. MF, myofibroblasts. E) Schematic representation of DT administration  
916 during acute colitis and regeneration. Mice received 2.5% DSS for 5 days, followed  
917 by regular water for 16 days. 100 $\mu$ l DT (20ng/g body weight) was administered  
918 intrarectally at days 4, 5 and 6 of the regime. F) Quantification of GFP<sup>+</sup> cells in the  
919 colon of control and *Col6a1<sup>DTR</sup>* mice after DT administration (n = 5-7 mice), G) H&E  
920 staining and H) histopathological score of *Col6a1<sup>DTR</sup>* and control (*Col6a1<sup>mTmG</sup>*,  
921 *iDTR<sup>ff/ff</sup>*) mice at the end of the protocol (Scale bar = 100  $\mu$ m) (n = 10-11 mice).  
922 Immunohistochemical analysis of I) CD34 and PDGFR $\alpha$  expression and J) CD34 and

923  $\alpha$ SMA expression in the colon of *Col6a1*<sup>DTR</sup> and control mice (Scale bar = 50  $\mu$ m) (n  
924 = 4 mice).

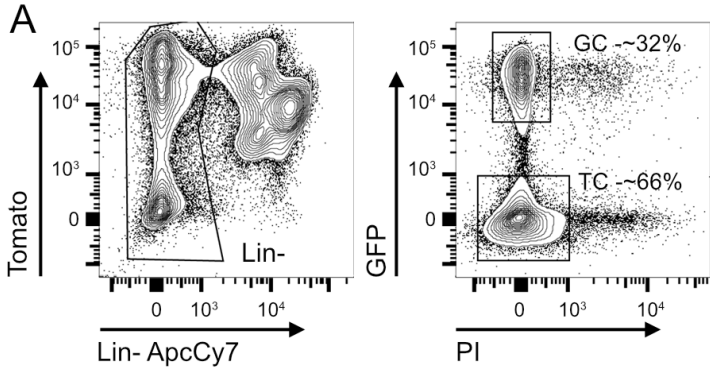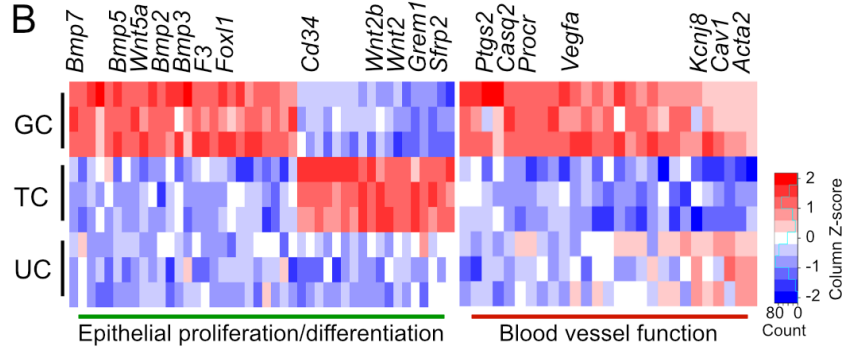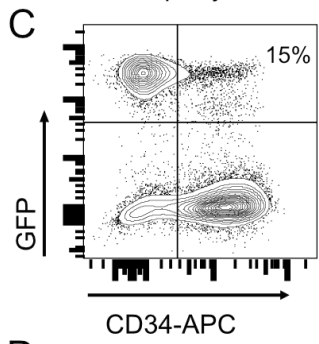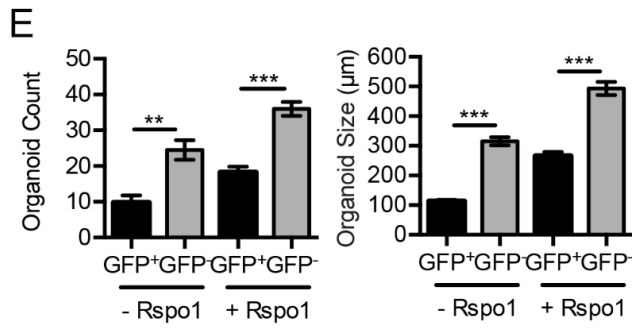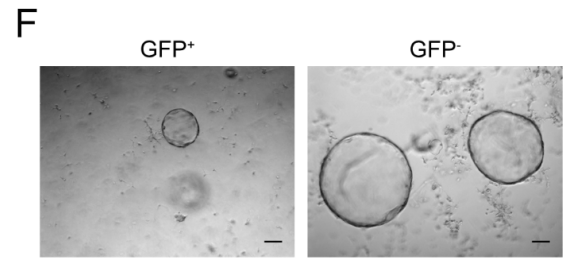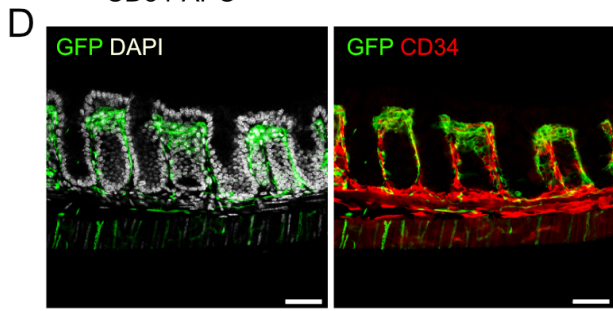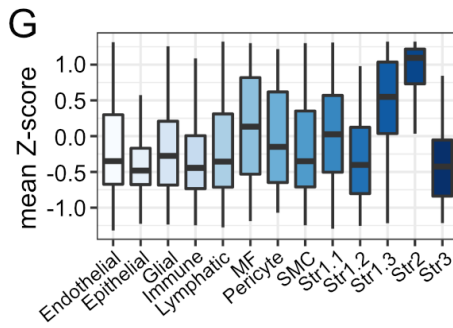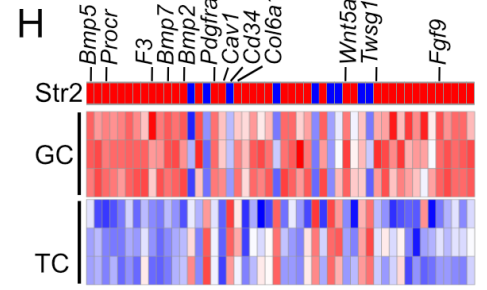



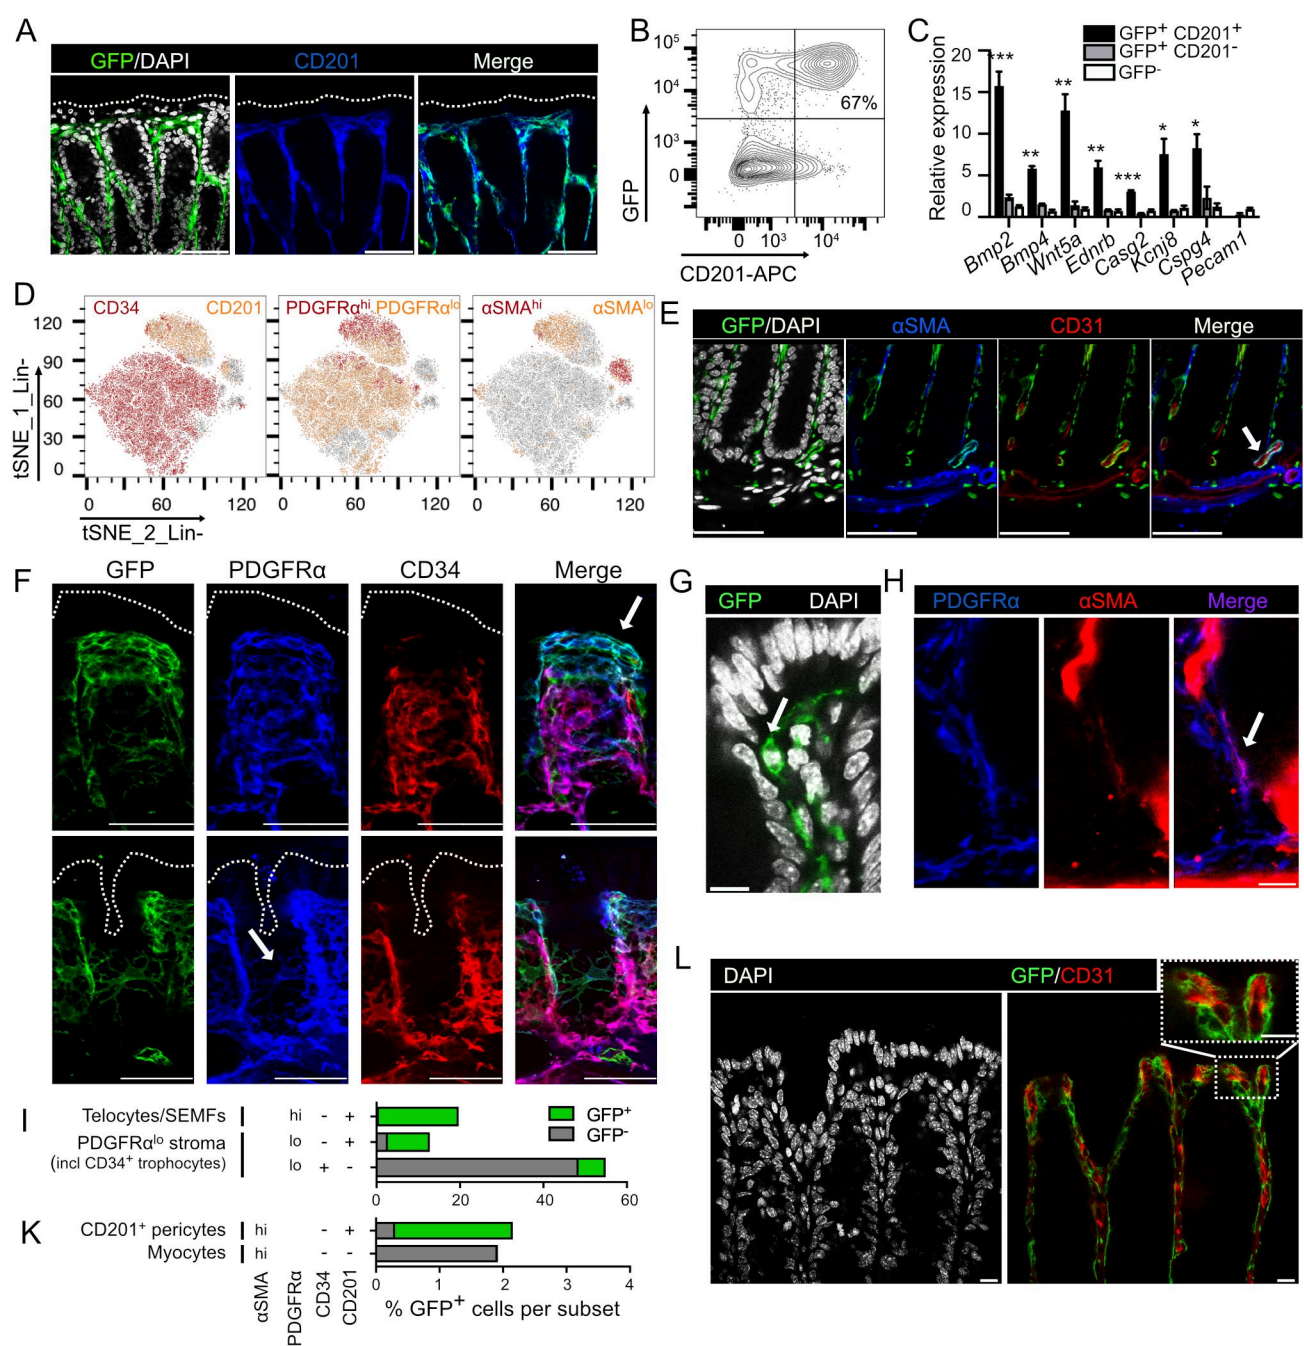

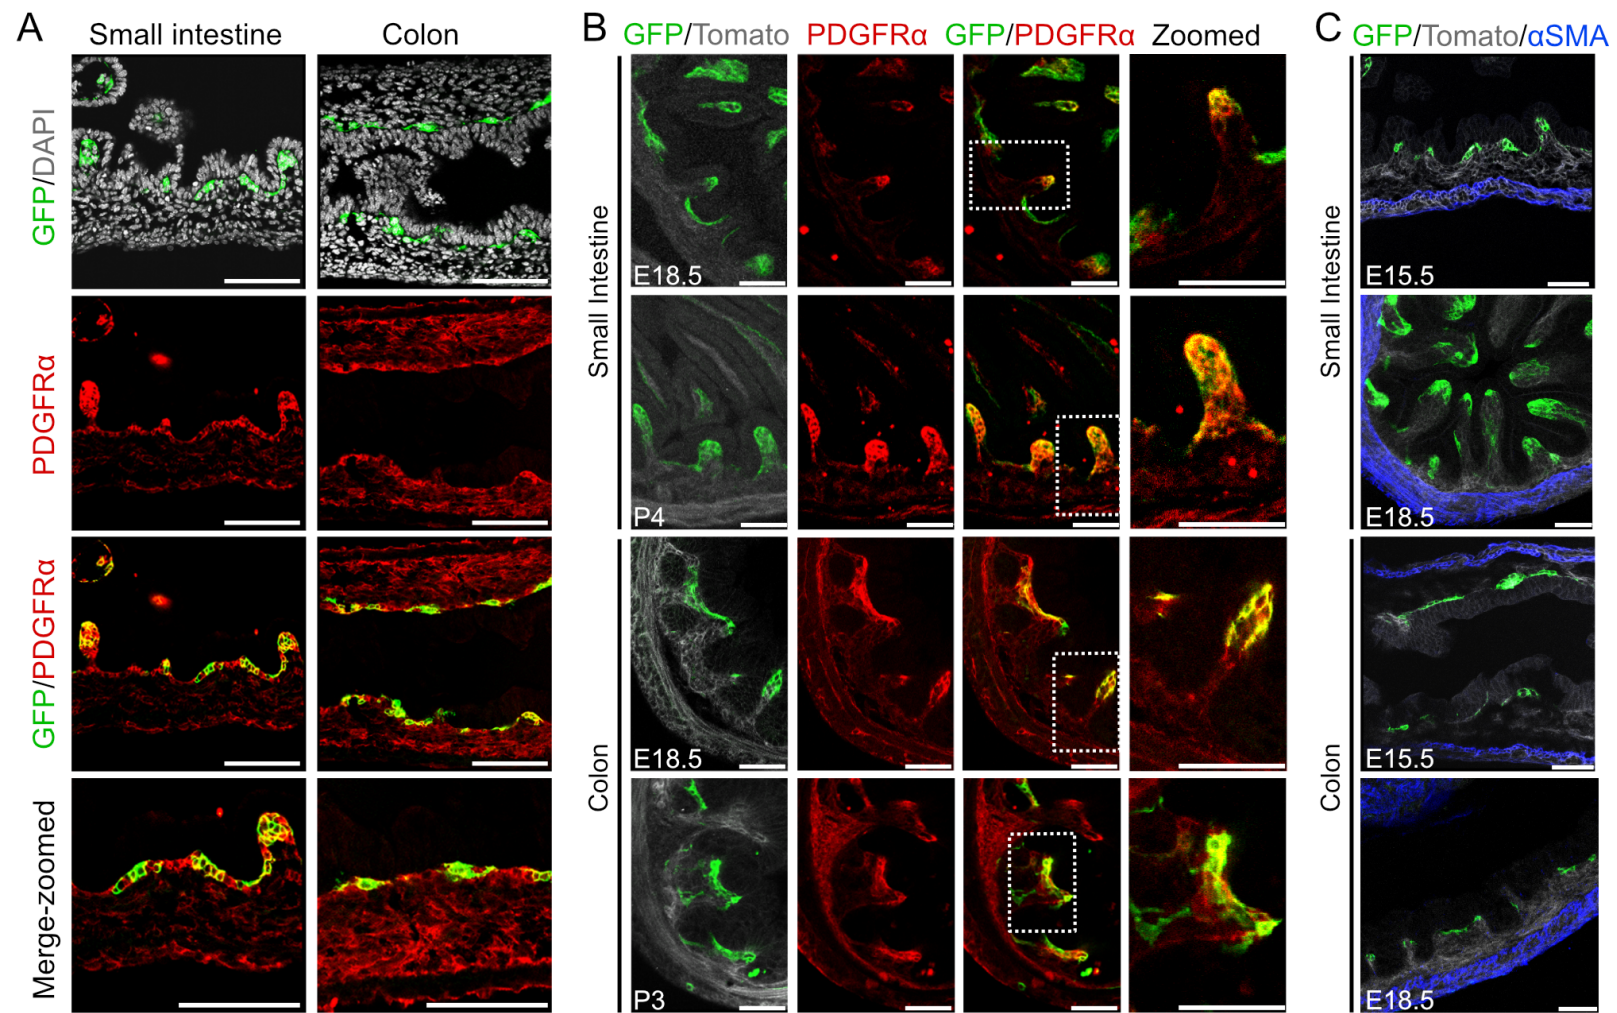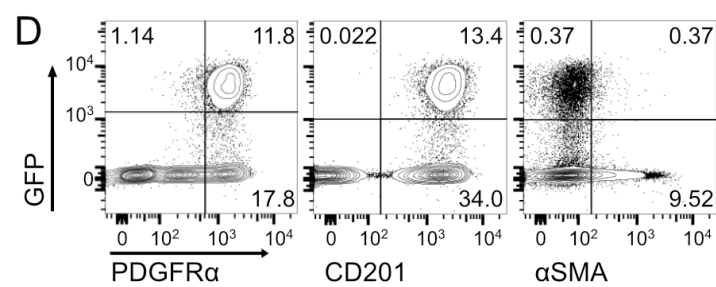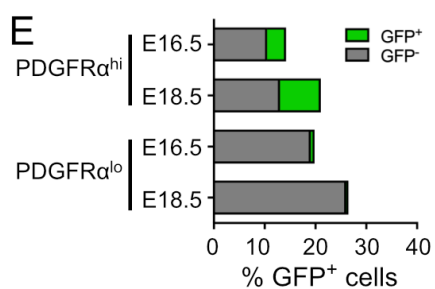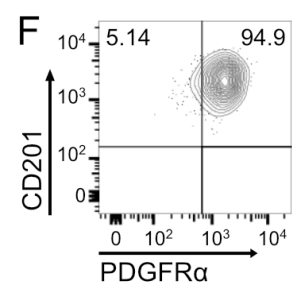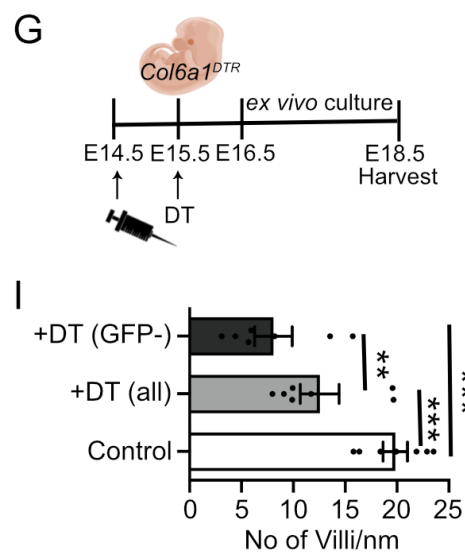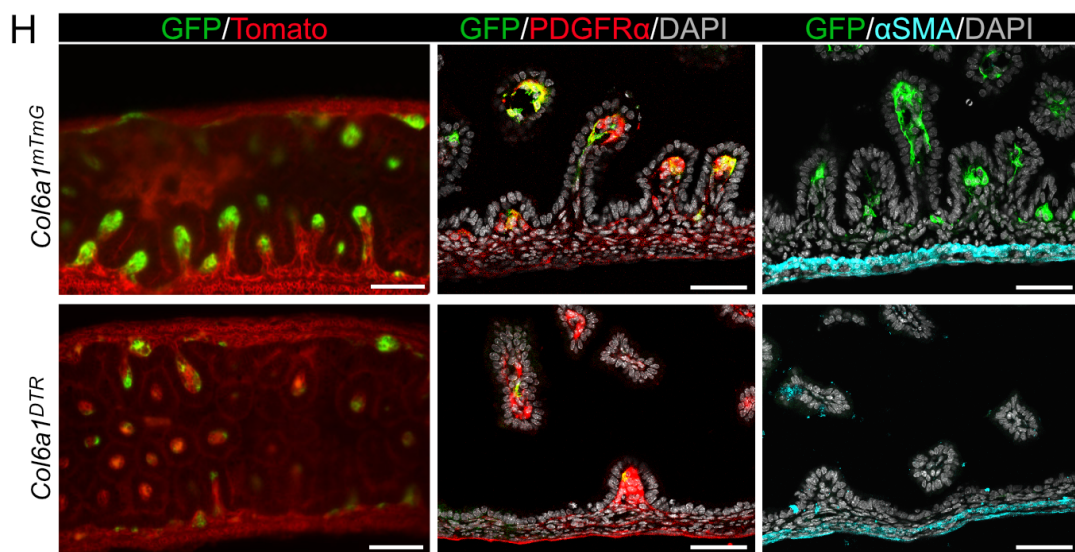



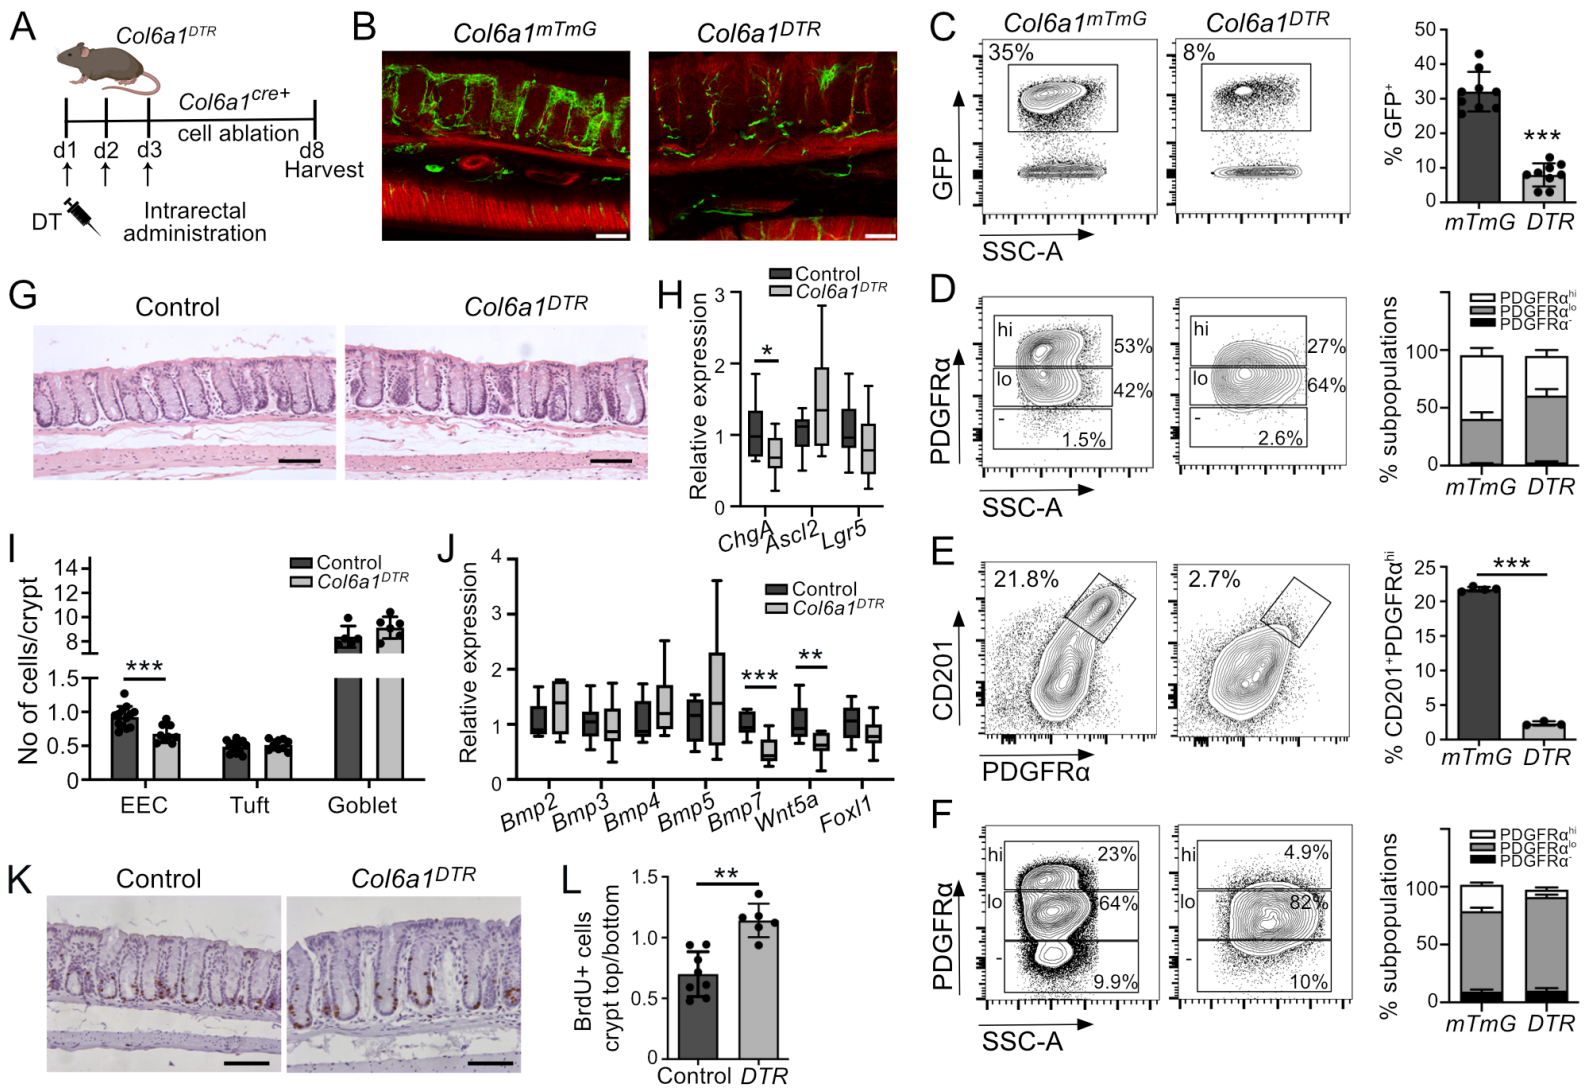

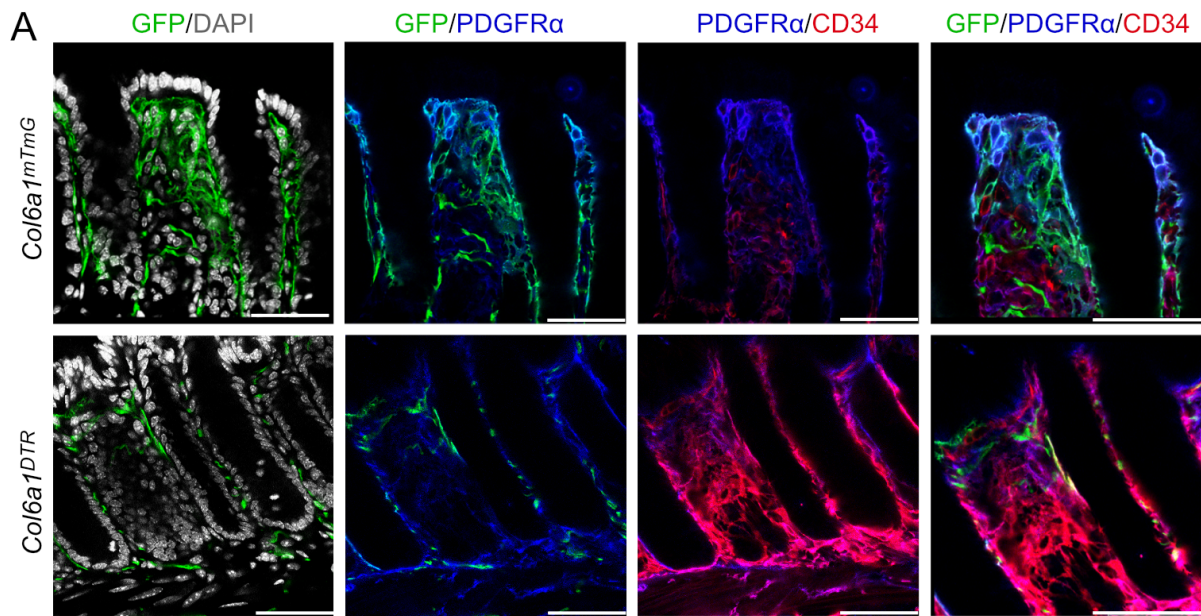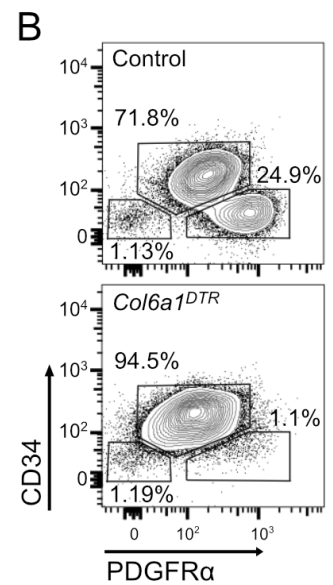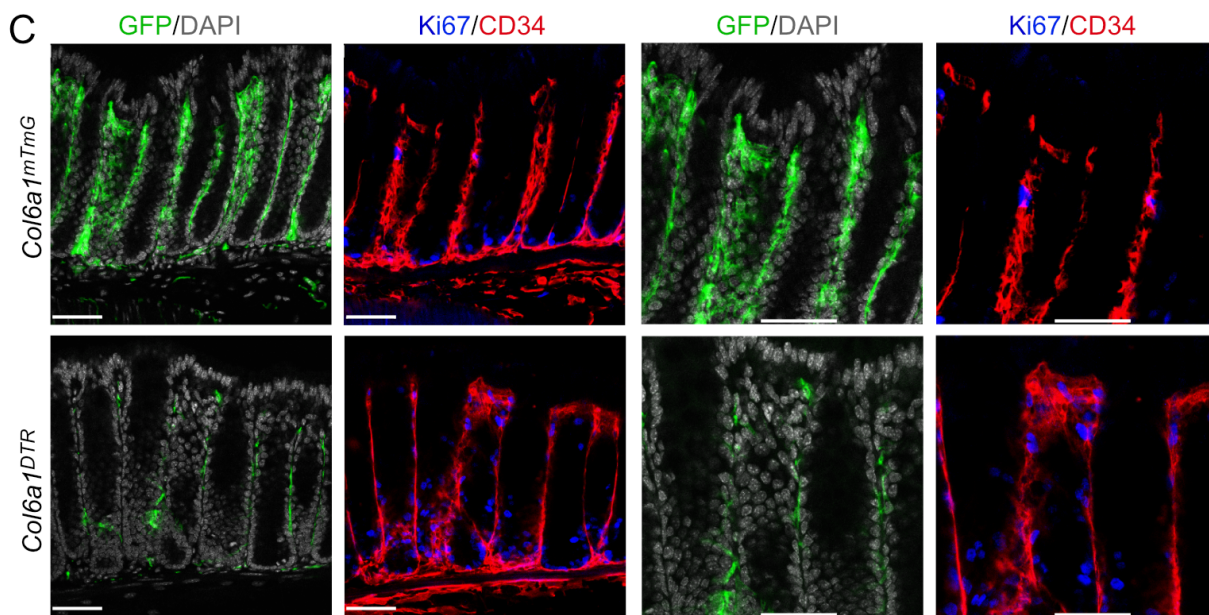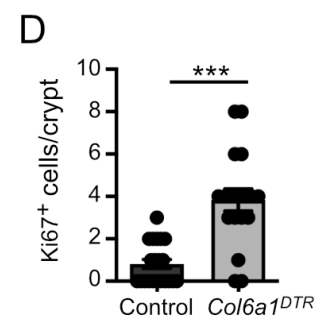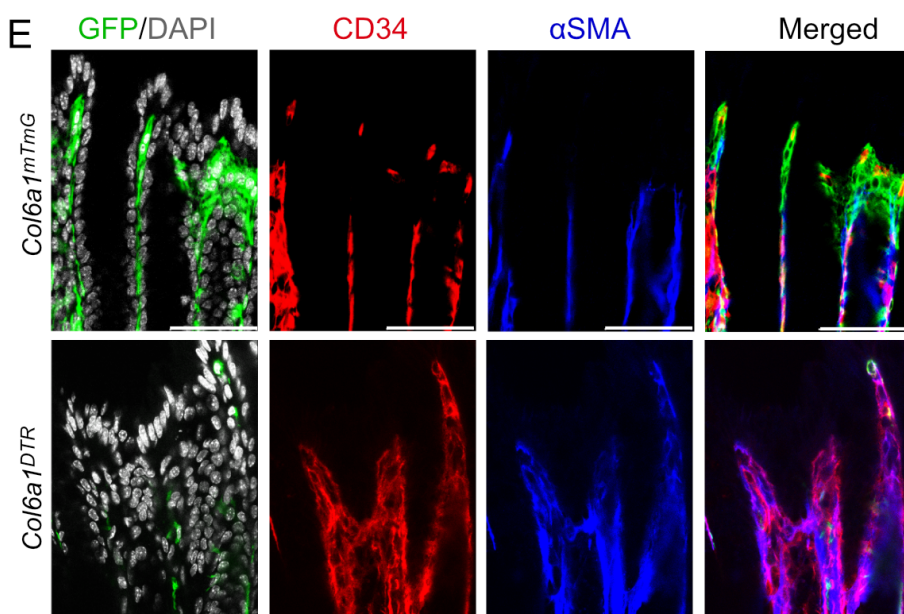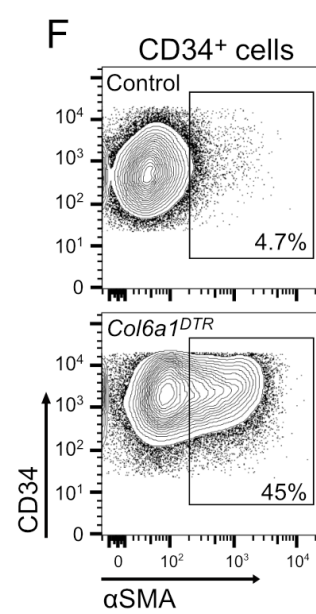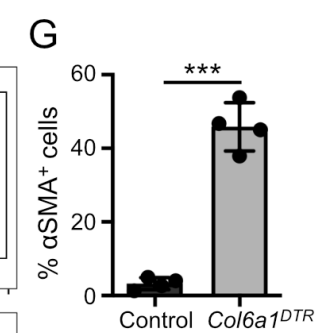



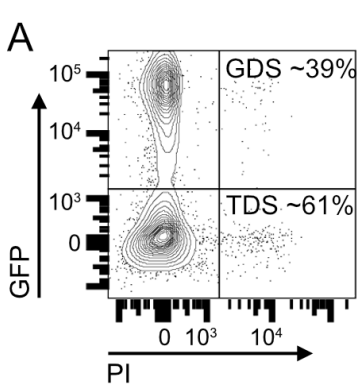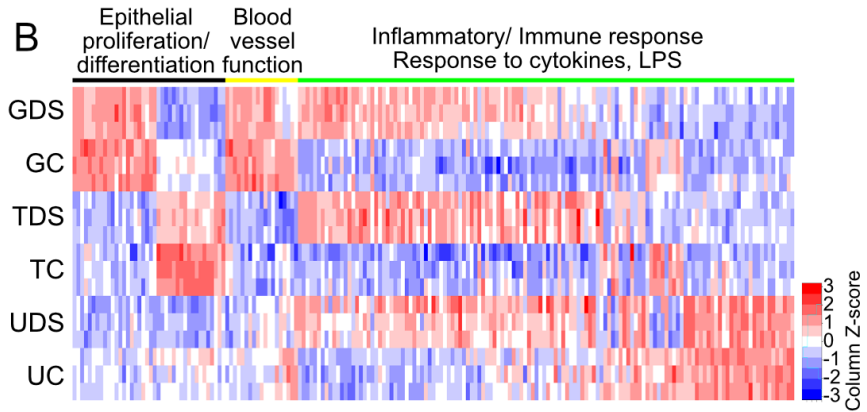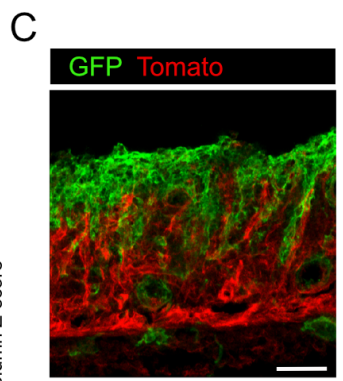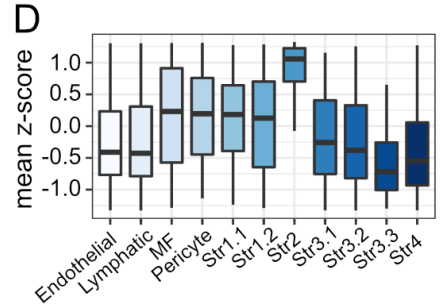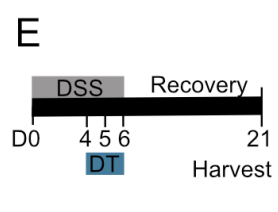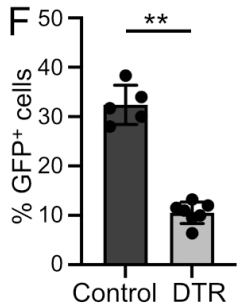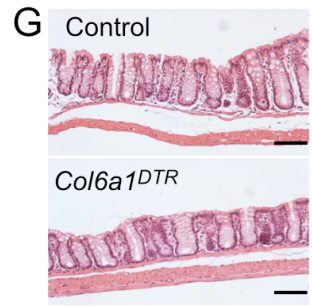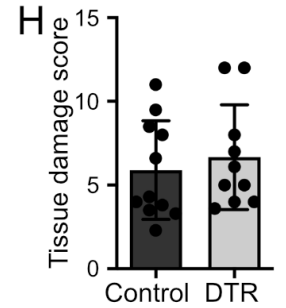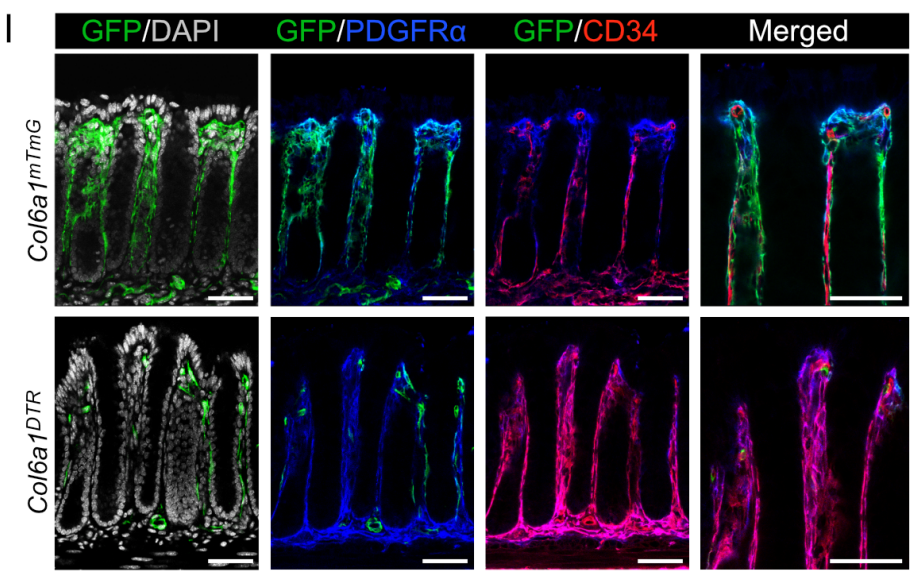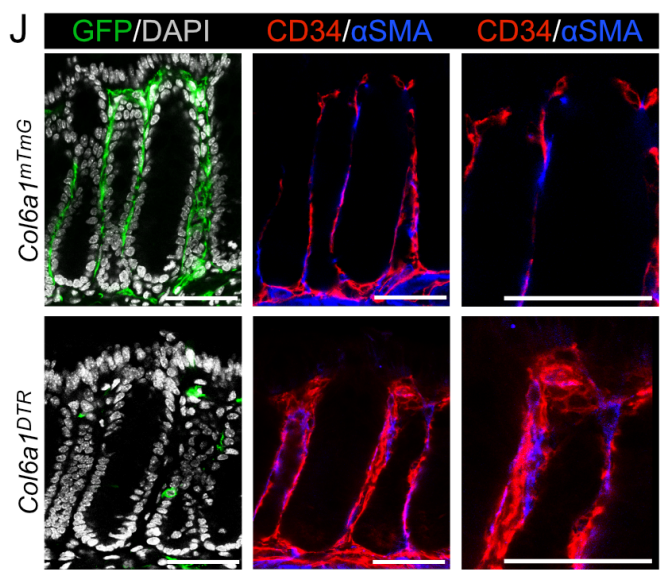

Source: https://biorxiv.org/content/10.1101/2021.02.16.431453v1.full.pdf
